# Supplementary material for: Patterns of within-host genetic diversity in SARS-CoV-2
Source: bioRxiv preprint, doi:10.1101/2020.12.23.424229, version 1 (2020-12-24)
Supplement: Supplementary Table 1 [file 424229_file02.csv]

sample_id	collection_date	received_date	adm2	biosample_sources	diagnostic_ct_value	n_samples
CAMB-7277D	2020-03-24	2020-03-24	CAMBRIDGESHIRE	CAMS000720	15.0	1
CAMB-7813D	2020-04-01	2020-04-02	ESSEX		22.0	0
CAMB-77F9E	2020-04-01	2020-04-02	BUCKINGHAMSHIRE		21.0	0
CAMB-7A3DB	2020-04-02	2020-04-03	ESSEX		24.0	0
CAMB-78030	2020-04-02	2020-04-02	GREATER_LONDON		27.0	0
CAMB-726F8	None	2020-03-24	BUCKINGHAMSHIRE		22.0	0
CAMB-75D5A	2020-03-29	2020-03-30			26.0	0
CAMB-76928	2020-03-29	2020-03-31	LONDON	CAMS001741	23.0	5
CAMB-77C2E	2020-04-02	2020-04-02	HERTFORDSHIRE		29.0	0
CAMB-72009	2020-03-28	2020-03-29	ESSEX		15.0	0
CAMB-7A2FC	2020-04-01	2020-04-03	ESSEX		21.0	0
CAMB-77FCB	2020-04-01	2020-04-02	GREATER_LONDON		25.0	0
CAMB-767C4	2020-03-30	2020-03-31	ESSEX		14.0	0
CAMB-71CF7	2020-03-30	2020-03-31	ESSEX		18.0	0
CAMB-76C89	2020-03-30	2020-03-31	GREATER_LONDON		20.0	0
CAMB-774CC	2020-03-31	2020-04-01	GREATER_LONDON		27.0	0
CAMB-726E9	2020-03-23	2020-03-24	GREATER_LONDON		27.0	0
CAMB-77866	2020-03-31	2020-04-01	HERTFORDSHIRE	CAMS001997	16.0	2
CAMB-7964C	2020-04-03	2020-04-04	HERTFORDSHIRE		25.0	0
CAMB-75EA2	2020-03-29	2020-03-30	GREATER_LONDON		29.0	0
CAMB-76BD7	2020-03-31	2020-03-31	BEDFORDSHIRE		16.0	0
CAMB-79266	2020-04-03	2020-04-04	ESSEX		28.0	0
CAMB-7A3AE	2020-04-02	2020-04-03	ESSEX		25.0	0
CAMB-71C7F	2020-03-31	2020-03-31	ESSEX		28.0	0
CAMB-79284	2020-04-03	2020-04-04	ESSEX		13.0	0
CAMB-76DC2	2020-03-31	2020-04-02	SUFFOLK		17.0	0
CAMB-723B5	2020-03-24	2020-03-24	BEDFORDSHIRE	CAMS000436	27.0	1
CAMB-7231F	2020-03-27	2020-03-28	BERKSHIRE		23.0	0
CAMB-79002	2020-04-03	2020-04-04	ESSEX		18.0	0
CAMB-76050	2020-03-30	2020-03-30	GREATER_LONDON		26.0	0
CAMB-76937	2020-03-30	2020-03-31	LONDON	CAMS001741	19.0	5
CAMB-76EED	2020-04-01	2020-04-02	SUFFOLK		23.0	0
CAMB-7A265	2020-04-03	2020-04-03	HERTFORDSHIRE		29.0	0
CAMB-71F49	2020-03-29	2020-03-29	CAMBRIDGESHIRE	CAMS001487	24.0	2
CAMB-7A6F0	2020-04-02	2020-04-03	BUCKINGHAMSHIRE		19.0	0
CAMB-71E00	2020-03-29	2020-03-31	BUCKINGHAMSHIRE		29.0	0
CAMB-77259	2020-03-30	2020-04-01	ESSEX		16.0	0
CAMB-79E44	None	2020-04-03	ESSEX		24.0	0
CAMB-72A0B	2020-03-23	2020-03-24	ESSEX		18.0	0
CAMB-76D2C	2020-04-01	2020-04-02	HERTFORDSHIRE		25.0	0
CAMB-77D76	2020-04-01	2020-04-02	ESSEX		29.0	0
CAMB-71B18	2020-03-31	2020-04-01	ESSEX		25.0	0
CAMB-76454	2020-03-30	2020-03-30	GREATER_LONDON		21.0	0
CAMB-79855	2020-04-01	2020-04-02	ESSEX		26.0	0
CAMB-764CD	2020-03-29	2020-03-30	ESSEX		21.0	0
CAMB-72713	2020-03-24	2020-03-24	BUCKINGHAMSHIRE		30.0	0
CAMB-79E9F	2020-04-01	2020-04-03	BEDFORDSHIRE	CAMS000488	22.0	1
CAMB-77C97	2020-03-31	2020-04-02	LONDON		22.0	0
CAMB-79EEA	2020-04-02	2020-04-03	ESSEX		29.0	0
CAMB-71D6D	2020-03-30	2020-03-31	LONDON		30.0	0
CAMB-72160	2020-03-28	2020-03-29	GREATER_LONDON		28.0	0
CAMB-759DE	2020-03-31	2020-04-01	BUCKINGHAMSHIRE	CAMS000668	28.0	2
CAMB-7806D	2020-04-01	2020-04-02	LONDON		19.0	0
CAMB-727F5	2020-03-23	2020-03-24	GREATER_LONDON		28.0	0
CAMB-72106	2020-03-28	2020-03-29	GREATER_LONDON		26.0	0
CAMB-798EC	2020-04-01	2020-04-02	BEDFORDSHIRE		21.0	0
CAMB-7A229	2020-04-02	2020-04-03	ESSEX		25.0	0
CAMB-79F6F	2020-04-02	2020-04-03	ESSEX	CAMS002412	18.0	2
CAMB-77AAC	2020-03-31	2020-04-02	BUCKINGHAMSHIRE		33.0	0
CAMB-7A371	2020-04-02	2020-04-03	OTHER		23.0	0
CAMB-76524	2020-03-29	2020-03-30	ESSEX		27.0	0
CAMB-722B8	2020-03-27	2020-03-29	ESSEX		31.0	0
CAMB-77B21	2020-04-01	2020-04-02	HERTFORDSHIRE		30.0	0
CAMB-75FBE	2020-03-28	2020-03-30	ESSEX		24.0	0
CAMB-76F26	2020-04-01	2020-04-02	ESSEX		13.0	0
CAMB-72731	2020-03-23	2020-03-24	ESSEX		20.0	0
CAMB-7A669	2020-04-02	2020-04-03	BUCKINGHAMSHIRE	CAMS002542	15.0	1
CAMB-71F76	2020-03-29	2020-03-29	ESSEX		25.0	0
CAMB-793BE	2020-04-02	2020-04-04	OTHER		20.0	0
CAMB-79E35	2020-04-01	2020-04-03	BEDFORDSHIRE		25.0	0
CAMB-7A9AC	2020-04-03	2020-04-03	ESSEX		27.0	0
CAMB-78FD9	2020-04-03	2020-04-04	LONDON		18.0	0
CAMB-767D3	2020-03-30	2020-03-31	HERTFORDSHIRE		17.0	0
CAMB-77F07	2020-04-01	2020-04-02	BUCKINGHAMSHIRE		23.0	0
CAMB-7A793	2020-04-02	2020-04-03	GREATER_LONDON		17.0	0
CAMB-76A34	2020-03-30	2020-03-31	LONDON		23.0	0
CAMB-792FD	2020-04-03	2020-04-04	BEDFORDSHIRE		29.0	0
CAMB-7804F	2020-04-01	2020-04-02	ESSEX		26.0	0
CAMB-71EE2	2020-03-29	2020-03-29	ESSEX	CAMS001362	17.0	1
CAMB-766B8	2020-03-30	2020-03-31	ESSEX	CAMS001586	25.0	2
CAMB-793CD	2020-04-03	2020-04-04	LONDON	CAMS002458	27.0	2
CAMB-72151	2020-03-28	2020-03-29	HERTFORDSHIRE		17.0	0
CAMB-77550	None	2020-04-01	LONDON		21.0	0
CAMB-75992	2020-03-31	2020-04-01	ESSEX		19.0	0
CAMB-71A93	2020-03-31	2020-04-01	HERTFORDSHIRE		26.0	0
CAMB-71DD6	2020-03-30	2020-03-31	SUFFOLK		15.0	0
CAMB-77523	2020-03-30	2020-04-01	LONDON	CAMS002054	26.0	2
CAMB-7A942	2020-04-03	2020-04-03	BEDFORDSHIRE		29.0	0
CAMB-76BE6	2020-03-29	2020-03-31	ESSEX		30.0	0
CAMB-77295	2020-03-31	2020-04-01	GREATER_LONDON		29.0	0
CAMB-7606F	2020-03-30	2020-03-31	ESSEX		17.0	0
CAMB-7A757	2020-04-02	2020-04-03	GREATER_LONDON		21.0	0
CAMB-7A6C3	2020-04-02	2020-04-03	BEDFORDSHIRE	CAMS000938	24.0	1
CAMB-79D47	2020-04-02	2020-04-03	CAMBRIDGESHIRE		18.0	0
CAMB-76DA4	2020-03-31	2020-04-02	SUFFOLK		17.0	0
CAMB-7955E	2020-04-03	2020-04-04	BEDFORDSHIRE	CAMS002757	26.0	1
CAMB-71E4C	2020-03-29	2020-03-30	CAMBRIDGESHIRE		15.0	0
CAMB-72898	2020-03-24	2020-03-24	CAMBRIDGESHIRE		17.0	0
CAMB-79F8D	2020-04-02	2020-04-03	ESSEX		23.0	0
CAMB-79327	2020-04-03	2020-04-04	ESSEX		27.0	0
CAMB-71B27	2020-04-01	2020-04-01	BEDFORDSHIRE	CAMS000919	25.0	2
CAMB-721BB	2020-03-28	2020-03-29	GREATER_LONDON		31.0	0
CAMB-77329	2020-03-31	2020-04-01	GREATER_LONDON		29.0	0
CAMB-7AA21	2020-04-03	2020-04-03	SUFFOLK		15.0	0
CAMB-77D3A	2020-04-01	2020-04-02	BUCKINGHAMSHIRE		20.0	0
CAMB-779BE	2020-03-31	2020-04-01	BEDFORDSHIRE		26.0	0
CAMB-774DB	2020-03-30	2020-04-01	BEDFORDSHIRE		29.0	0
CAMB-772E0	2020-03-31	2020-04-01	ESSEX		22.0	0
CAMB-7279B	2020-03-23	2020-03-24	HERTFORDSHIRE		22.0	0
CAMB-7A62D	2020-04-02	2020-04-03	BUCKINGHAMSHIRE		27.0	0
CAMB-77602	2020-03-31	2020-04-01	ESSEX		23.0	0
CAMB-7724A	2020-04-01	2020-04-02	ESSEX		30.0	0
CAMB-79F9C	2020-04-02	2020-04-03	OTHER		28.0	0
CAMB-772A4	2020-03-31	2020-04-01	ESSEX		24.0	0
CAMB-78FF7	2020-04-03	2020-04-04	ESSEX		26.0	0
CAMB-79697	2020-04-03	2020-04-04	ESSEX		28.0	0
CAMB-79D38	2020-04-02	2020-04-03	HERTFORDSHIRE		27.0	0
CAMB-7616C	2020-03-30	2020-03-31	ESSEX		23.0	0
CAMB-77347	2020-03-31	2020-04-01	HERTFORDSHIRE		27.0	0
CAMB-78E72	2020-04-02	2020-04-04	BEDFORDSHIRE		31.0	0
CAMB-72555	None	None	None		None	0
CAMB-77DD0	2020-04-02	2020-04-02	ESSEX		16.0	0
CAMB-72ADE	2020-03-22	2020-03-24	BEDFORDSHIRE	CAMS000661	26.0	2
CAMB-79B98	2020-04-02	2020-04-03	GREATER_LONDON		18.0	0
CAMB-7A03E	2020-04-02	2020-04-03	HERTFORDSHIRE		19.0	0
CAMB-72A56	2020-03-23	2020-03-24	ESSEX		25.0	0
CAMB-723C4	2020-03-24	2020-03-24	HERTFORDSHIRE		24.0	0
CAMB-771A7	2020-04-01	2020-04-02	GREATER_LONDON		26.0	0
CAMB-75E2A	2020-03-29	2020-03-30	HERTFORDSHIRE		25.0	0
CAMB-720EB	2020-03-28	2020-03-29	ESSEX		24.0	0
CAMB-767F1	2020-03-29	2020-03-31	SUFFOLK	CAMS001803	25.0	2
CAMB-71E6A	2020-03-28	2020-03-29	BUCKINGHAMSHIRE	CAMS001503	27.0	2
CAMB-778FD	2020-03-31	2020-04-01	LONDON		26.0	0
CAMB-78C96	2020-04-03	2020-04-04	HERTFORDSHIRE		24.0	0
CAMB-75DA5	2020-03-29	2020-03-30	HERTFORDSHIRE	CAMS001604	17.0	2
CAMB-77FAD	2020-04-01	2020-04-02	GREATER_LONDON		17.0	0
CAMB-76C5C	2020-03-30	2020-03-31	ESSEX		28.0	0
CAMB-79DCF	2020-04-02	2020-04-03	SUFFOLK	CAMS001914	25.0	3
CAMB-76A61	2020-03-30	2020-03-31	LONDON		24.0	0
CAMB-76560	2020-03-29	2020-03-30	ESSEX		21.0	0
CAMB-7A07A	2020-04-02	2020-04-03	ESSEX		29.0	0
CAMB-78E09	2020-04-02	2020-04-04	BEDFORDSHIRE	CAMS002621	23.0	2
CAMB-7A5D5	2020-04-01	2020-04-03	ESSEX		28.0	0
CAMB-798FB	2020-04-01	2020-04-02	BEDFORDSHIRE		22.0	0
CAMB-78DFD	2020-04-02	2020-04-04	BEDFORDSHIRE		23.0	0
CAMB-78D93	2020-04-03	2020-04-04	ESSEX		24.0	0
CAMB-71DB8	2020-03-30	2020-03-31	BEDFORDSHIRE		27.0	0
CAMB-78B99	2020-04-03	2020-04-04	SUFFOLK		22.0	0
CAMB-7591A	2020-03-31	2020-04-01	HERTFORDSHIRE		27.0	0
CAMB-75F54	2020-03-30	2020-03-30	HERTFORDSHIRE		25.0	0
CAMB-7970D	2020-04-04	2020-04-04	GREATER_LONDON		15.0	0
CAMB-72081	2020-03-28	2020-03-29	GREATER_LONDON		22.0	0
CAMB-77A60	2020-03-31	2020-04-02	HERTFORDSHIRE		15.0	0
CAMB-79CA4	2020-04-02	2020-04-03	GREATER_LONDON		26.0	0
CAMB-776D5	2020-03-31	2020-04-01	HERTFORDSHIRE		28.0	0
CAMB-79925	2020-04-01	2020-04-02	BEDFORDSHIRE		20.0	0
CAMB-76A9E	2020-03-29	2020-03-31	ESSEX		24.0	0
CAMB-7A2DE	2020-04-01	2020-04-03	OTHER		24.0	0
CAMB-71F85	2020-03-28	2020-03-29	ESSEX		24.0	0
CAMB-790E4	2020-04-03	2020-04-04	LONDON		30.0	0
CAMB-76DE0	2020-04-01	2020-04-02	SUFFOLK	CAMS002177	19.0	1
CAMB-7282F	2020-03-22	2020-03-24	GREATER_LONDON		24.0	0
CAMB-77365	2020-03-31	2020-04-01	HERTFORDSHIRE		30.0	0
CAMB-773DE	2020-03-31	2020-04-01	ESSEX		24.0	0
CAMB-774F9	2020-03-31	2020-04-01	ESSEX		24.0	0
CAMB-71D03	2020-03-30	2020-03-31	ESSEX		22.0	0
CAMB-78100	None	None	None		None	0
CAMB-76A8F	2020-03-29	2020-03-31	ESSEX		24.0	0
CAMB-75A62	2020-03-29	2020-03-30	ESSEX	CAMS001555	29.0	2
CAMB-79785	2020-04-01	2020-04-02	BEDFORDSHIRE		28.0	0
CAMB-775BA	2020-03-31	2020-04-01	ESSEX		19.0	0
CAMB-76AF8	2020-03-31	2020-03-31	HERTFORDSHIRE	CAMS001762	30.0	3
CAMB-76C4D	2020-03-29	2020-03-31	LONDON		24.0	0
CAMB-72634	2020-03-24	2020-03-24			19.0	0
CAMB-765BB	2020-03-30	2020-03-30	HERTFORDSHIRE		26.0	0
CAMB-7714D	2020-04-01	2020-04-02	GREATER_LONDON		25.0	0
CAMB-772D1	2020-03-31	2020-04-01	ESSEX		27.0	0
CAMB-790F3	2020-04-04	2020-04-04	ESSEX		24.0	0
CAMB-7A63C	2020-04-01	2020-04-03	BUCKINGHAMSHIRE		25.0	0
CAMB-7269E	2020-03-23	2020-03-24	SUFFOLK		28.0	0
CAMB-77BD6	2020-04-03	2020-04-03	GREATER_LONDON	CAMS002472	16.0	2
CAMB-7A380	2020-04-03	2020-04-03	ESSEX		21.0	0
CAMB-768EF	2020-03-29	2020-03-31	BUCKINGHAMSHIRE		16.0	0
CAMB-79E08	2020-04-02	2020-04-03	ESSEX		19.0	0
CAMB-7A274	2020-04-02	2020-04-03	ESSEX		26.0	0
CAMB-795B8	2020-04-03	2020-04-04	HERTFORDSHIRE		28.0	0
CAMB-76894	2020-03-29	2020-03-31	SUFFOLK		22.0	0
CAMB-7A502	2020-04-02	2020-04-03	BUCKINGHAMSHIRE		None	0
CAMB-7225E	2020-03-28	2020-03-29	BEDFORDSHIRE		19.0	0
CAMB-776A8	2020-03-31	2020-04-01	GREATER_LONDON		30.0	0
CAMB-72018	2020-03-27	2020-03-29	ESSEX		25.0	0
CAMB-72379	2020-03-24	2020-03-25	CAMBRIDGESHIRE	CAMS000786	21.0	1
CAMB-7962E	2020-04-03	2020-04-04	HERTFORDSHIRE		23.0	0
CAMB-76A25	2020-03-30	2020-03-31	ESSEX		26.0	0
CAMB-79F50	2020-04-02	2020-04-03	BEDFORDSHIRE	CAMS002327	16.0	2
CAMB-72740	2020-03-23	2020-03-24	ESSEX		16.0	0
CAMB-71DC7	2020-03-30	2020-03-31	HERTFORDSHIRE		27.0	0
CAMB-7287A	2020-03-22	2020-03-24	ESSEX		17.0	0
CAMB-7681C	2020-03-30	2020-03-31	SUFFOLK		29.0	0
CAMB-767B5	2020-03-31	2020-03-31	GREATER_LONDON		25.0	0
CAMB-7A49C	2020-04-01	2020-04-03	BUCKINGHAMSHIRE		25.0	0
CAMB-77848	2020-03-31	2020-04-01	BEDFORDSHIRE		23.0	0
CAMB-7666D	2020-03-29	2020-03-30	ESSEX		18.0	0
CAMB-766E5	2020-03-30	2020-03-31	HERTFORDSHIRE		16.0	0
CAMB-76973	2020-03-29	2020-03-31	ESSEX	CAMS001053	27.0	1
CAMB-7A7EE	2020-04-02	2020-04-03	GREATER_LONDON		24.0	0
CAMB-72142	2020-03-28	2020-03-29	HERTFORDSHIRE		20.0	0
CAMB-7B668	2020-04-04	2020-04-04	ESSEX		24.0	0
CAMB-7A60F	2020-04-03	2020-04-03	SUFFOLK		23.0	0
CAMB-75FEB	2020-03-28	2020-03-30	ESSEX	CAMS001586	28.0	2
CAMB-71E5B	2020-03-28	2020-03-29	BEDFORDSHIRE		28.0	0
CAMB-72133	2020-03-28	2020-03-29	GREATER_LONDON		23.0	0
CAMB-79DDE	2020-04-02	2020-04-03	ESSEX		28.0	0
CAMB-72519	2020-03-21	2020-03-24	CAMBRIDGESHIRE		20.0	0
CAMB-7664F	2020-03-29	2020-03-30	GREATER_LONDON	CAMS001662	16.0	2
CAMB-763B1	2020-03-29	2020-03-30	ESSEX		31.0	0
CAMB-79B89	2020-04-02	2020-04-03	ESSEX		15.0	0
CAMB-777D2	2020-03-31	2020-04-01	BEDFORDSHIRE		26.0	0
CAMB-7A39F	2020-04-01	2020-04-03	OTHER		24.0	0
CAMB-76427	2020-03-30	2020-03-30	ESSEX		20.0	0
CAMB-78D48	2020-04-03	2020-04-04	HERTFORDSHIRE		30.0	0
CAMB-79345	2020-04-03	2020-04-04	ESSEX		21.0	0
CAMB-77A33	2020-04-01	2020-04-02	GREATER_LONDON		19.0	0
CAMB-7A7DF	2020-04-02	2020-04-03	HERTFORDSHIRE		25.0	0
CAMB-72115	2020-03-28	2020-03-29	HERTFORDSHIRE		24.0	0
CAMB-72467	2020-03-24	2020-03-24	ESSEX		22.0	0
CAMB-7A6B4	2020-04-02	2020-04-03	BUCKINGHAMSHIRE	CAMS002135	15.0	2
CAMB-723A6	2020-03-23	2020-03-24	HERTFORDSHIRE		28.0	0
CAMB-77C4C	2020-04-02	2020-04-02	HERTFORDSHIRE		26.0	0
CAMB-78B11	2020-04-03	2020-04-04	ESSEX		30.0	0
CAMB-76867	2020-03-30	2020-03-31	LONDON		29.0	0
CAMB-7A2ED	2020-04-02	2020-04-03	LONDON		30.0	0
CAMB-77D85	2020-04-01	2020-04-02	HERTFORDSHIRE		21.0	0
CAMB-767E2	2020-03-30	2020-03-31	CAMBRIDGESHIRE	CAMS001715	26.0	4
CAMB-71CAC	2020-03-30	2020-03-31	BUCKINGHAMSHIRE		29.0	0
CAMB-725BF	2020-03-23	2020-03-24	ESSEX		20.0	0
CAMB-75ADB	2020-03-29	2020-03-30	ESSEX		24.0	0
CAMB-7980A	2020-04-01	2020-04-02	BEDFORDSHIRE	CAMS002327	24.0	2
CAMB-79FD8	2020-04-02	2020-04-03	ESSEX		29.0	0
CAMB-723F1	2020-03-24	2020-03-24	SUFFOLK		31.0	0
CAMB-7765D	2020-03-31	2020-04-01	HERTFORDSHIRE		26.0	0
CAMB-75C02	2020-03-28	2020-03-30	BUCKINGHAMSHIRE		26.0	0
CAMB-7A14A	2020-04-02	2020-04-03	ESSEX		23.0	0
CAMB-76C6B	2020-03-30	2020-03-31	GREATER_LONDON		18.0	0
CAMB-772FF	2020-03-31	2020-04-01	ESSEX		21.0	0
CAMB-75CC6	2020-03-28	2020-03-30	BUCKINGHAMSHIRE		25.0	0
CAMB-7657F	2020-03-29	2020-03-30	ESSEX		27.0	0
CAMB-79907	2020-04-01	2020-04-02	BEDFORDSHIRE		13.0	0
CAMB-79E71	2020-04-01	2020-04-03	BEDFORDSHIRE		24.0	0
CAMB-7622D	2020-03-30	2020-03-30	BEDFORDSHIRE		27.0	0
CAMB-760BA	None	2020-03-30	BEDFORDSHIRE		17.0	0
CAMB-75C6C	2020-03-28	2020-03-30	BUCKINGHAMSHIRE		18.0	0
CAMB-729C2	2020-03-23	2020-03-24	ESSEX		23.0	0
CAMB-7A326	2020-04-02	2020-04-03	OTHER	CAMS002482	28.0	1
CAMB-778C0	2020-03-31	2020-04-01	BEDFORDSHIRE		18.0	0
CAMB-76ABC	2020-03-29	2020-03-31	ESSEX		14.0	0
CAMB-75CE4	2020-03-29	2020-03-30	SUFFOLK		16.0	0
CAMB-75D87	2020-03-29	2020-03-30	HERTFORDSHIRE		27.0	0
CAMB-7A836	2020-04-02	2020-04-03	GREATER_LONDON		19.0	0
CAMB-76533	2020-03-29	2020-03-30	ESSEX		30.0	0
CAMB-77DA3	2020-04-01	2020-04-02	SUFFOLK		19.0	0
CAMB-772B3	2020-03-31	2020-04-01	ESSEX		13.0	0
CAMB-7A5A8	2020-04-02	2020-04-03	CAMBRIDGESHIRE		29.0	0
CAMB-77ECE	2020-04-01	2020-04-02	HERTFORDSHIRE		27.0	0
CAMB-75C20	2020-03-28	2020-03-30			28.0	0
CAMB-77CA6	2020-04-01	2020-04-02	ESSEX		27.0	0
CAMB-79C1D	2020-04-01	2020-04-03	ESSEX		31.0	0
CAMB-78B8A	2020-04-02	2020-04-04	ESSEX		32.0	0
CAMB-72A47	2020-03-23	2020-03-24	LONDON		25.0	0
CAMB-77110	2020-04-01	2020-04-02	LONDON		25.0	0
CAMB-7712F	2020-04-01	2020-04-02	ESSEX		15.0	0
CAMB-7A5E4	2020-04-02	2020-04-03	BUCKINGHAMSHIRE		27.0	0
CAMB-72977	2020-03-23	2020-03-24	ESSEX		18.0	0
CAMB-71D21	2020-03-30	2020-03-31	ESSEX		20.0	0
CAMB-77C3D	2020-03-31	2020-04-02	SUFFOLK	CAMS001867	16.0	4
CAMB-79F14	2020-04-02	2020-04-03	HERTFORDSHIRE		18.0	0
CAMB-79E62	2020-04-02	2020-04-03	ESSEX		19.0	0
CAMB-79B3E	2020-04-02	2020-04-03	GREATER_LONDON		30.0	0
CAMB-7676A	2020-03-30	2020-03-31	BUCKINGHAMSHIRE		18.0	0
CAMB-7278C	2020-03-23	2020-03-24	GREATER_LONDON		21.0	0
CAMB-78F42	2020-04-03	2020-04-04	HERTFORDSHIRE		33.0	0
CAMB-79FAB	2020-04-01	2020-04-03	ESSEX		20.0	0
CAMB-7229A	2020-03-27	2020-03-29	ESSEX		27.0	0
CAMB-76542	2020-03-29	2020-03-30	ESSEX	CAMS001670	30.0	2
CAMB-762D2	2020-03-28	2020-03-30	HERTFORDSHIRE		26.0	0
CAMB-795E5	2020-04-03	2020-04-04	HERTFORDSHIRE		29.0	0
CAMB-7B64A	2020-04-03	2020-04-04	SUFFOLK		21.0	0
CAMB-7757E	2020-03-30	2020-04-01	ESSEX		28.0	0
CAMB-75BAB	2020-03-28	2020-03-30	BUCKINGHAMSHIRE		18.0	0
CAMB-727C8	2020-03-23	2020-03-24	HERTFORDSHIRE		30.0	0
CAMB-760E7	2020-03-30	2020-03-31	ESSEX		18.0	0
CAMB-777C3	2020-03-31	2020-04-01	ESSEX		30.0	0
CAMB-72203	2020-03-29	2020-03-29	HERTFORDSHIRE		29.0	0
CAMB-71B45	2020-03-30	2020-04-01	SUFFOLK		17.0	0
CAMB-7632A	2020-03-29	2020-03-30	ESSEX		26.0	0
CAMB-79BA7	2020-04-02	2020-04-03	ESSEX		30.0	0
CAMB-75F63	2020-03-29	2020-03-30	ESSEX		22.0	0
CAMB-7609C	2020-03-30	2020-03-30	CAMBRIDGESHIRE	CAMS001656	27.0	1
CAMB-79819	2020-04-01	2020-04-02	ESSEX		19.0	0
CAMB-75FDC	2020-03-28	2020-03-30	ESSEX		12.0	0
CAMB-725FB	2020-03-24	2020-03-24	HERTFORDSHIRE		22.0	0
CAMB-75F27	2020-03-29	2020-03-30	GREATER_LONDON		23.0	0
CAMB-777A5	2020-03-31	2020-04-01	BEDFORDSHIRE		16.0	0
CAMB-71AEE	2020-03-31	2020-04-01	SUFFOLK		27.0	0
CAMB-71FA3	2020-03-29	2020-03-30	HERTFORDSHIRE	CAMS001467	27.0	2
CAMB-7A353	2020-04-01	2020-04-03	ESSEX		23.0	0
CAMB-76B9B	2020-03-31	2020-03-31	HERTFORDSHIRE		24.0	0
CAMB-7A599	2020-04-02	2020-04-03	ESSEX		25.0	0
CAMB-7A55D	2020-04-01	2020-04-03	HERTFORDSHIRE	CAMS002128	24.0	2
CAMB-720CD	2020-03-28	2020-03-29	ESSEX	CAMS001020	16.0	1
CAMB-71ADF	2020-04-01	2020-04-01	GREATER_LONDON	CAMS001953	24.0	1
CAMB-7291D	2020-03-23	2020-03-24	ESSEX	CAMS000584	15.0	1
CAMB-76490	2020-03-30	2020-03-30			20.0	0
CAMB-721AC	2020-03-28	2020-03-29	GREATER_LONDON		25.0	0
CAMB-79776	2020-04-01	2020-04-02	ESSEX		28.0	0
CAMB-78CF0	2020-04-02	2020-04-04	ESSEX		27.0	0
CAMB-79C77	2020-04-01	2020-04-03	OTHER		19.0	0
CAMB-79FF6	2020-04-02	2020-04-03	HERTFORDSHIRE		18.0	0
CAMB-75CD5	2020-03-30	2020-03-30	CAMBRIDGESHIRE	CAMS001487	29.0	2
CAMB-7A748	2020-04-02	2020-04-03	HERTFORDSHIRE		30.0	0
CAMB-77277	2020-03-31	2020-04-01	ESSEX		26.0	0
CAMB-7A739	2020-04-02	2020-04-03	HERTFORDSHIRE		27.0	0
CAMB-78E54	2020-04-02	2020-04-04	BEDFORDSHIRE	CAMS002607	25.0	1
CAMB-77CF1	2020-03-31	2020-04-02	SUFFOLK	CAMS002291	21.0	2
CAMB-75D78	2020-03-29	2020-03-30	GREATER_LONDON		30.0	0
CAMB-7624B	None	2020-03-30	SUFFOLK		12.0	0
CAMB-78C87	2020-04-03	2020-04-04	ESSEX		14.0	0
CAMB-77893	2020-03-31	2020-04-01	ESSEX		20.0	0
CAMB-76111	2020-03-30	2020-03-30	CAMBRIDGESHIRE		24.0	0
CAMB-769DD	2020-03-30	2020-03-31	SUFFOLK	CAMS001803	20.0	2
CAMB-71EC4	2020-03-28	2020-03-29	LONDON		21.0	0
CAMB-78D84	2020-04-02	2020-04-04	BEDFORDSHIRE		25.0	0
CAMB-77FF8	2020-04-01	2020-04-02	CAMBRIDGESHIRE		25.0	0
CAMB-7907B	2020-04-03	2020-04-04	LONDON		23.0	0
CAMB-75F45	2020-03-29	2020-03-30	GREATER_LONDON		13.0	0
CAMB-77954	2020-03-31	2020-04-01	ESSEX		21.0	0
CAMB-778A2	2020-03-30	2020-04-01	BEDFORDSHIRE	CAMS002275	30.0	1
CAMB-725EC	2020-03-23	2020-03-24	LONDON	CAMS000654	None	1
CAMB-7608D	2020-03-30	2020-03-31	ESSEX	CAMS001309	20.0	1
CAMB-75B8D	2020-03-28	2020-03-30	BUCKINGHAMSHIRE		27.0	0
CAMB-79390	2020-04-03	2020-04-04	ESSEX	CAMS002162	24.0	2
CAMB-762A5	2020-03-29	2020-03-30	ESSEX		24.0	0
CAMB-79C68	2020-04-02	2020-04-03	GREATER_LONDON		30.0	0
CAMB-71CD9	2020-03-30	2020-03-31	BUCKINGHAMSHIRE		20.0	0
CAMB-7B598	2020-04-04	2020-04-04	HERTFORDSHIRE		28.0	0
CAMB-75C3F	2020-03-29	2020-03-30	CAMBRIDGESHIRE		30.0	0
CAMB-7A2B0	2020-04-01	2020-04-03	BUCKINGHAMSHIRE		18.0	0
CAMB-72582	2020-03-23	2020-03-24	CAMBRIDGESHIRE		25.0	0
CAMB-779EB	2020-03-31	2020-04-01	BEDFORDSHIRE		26.0	0
CAMB-77B7C	2020-04-01	2020-04-02	ESSEX		16.0	0
CAMB-763A2	2020-03-30	2020-03-30	ESSEX		19.0	0
CAMB-77C5B	2020-03-31	2020-04-02	SUFFOLK	CAMS001538	22.0	2
CAMB-72300	2020-03-27	2020-03-29	ESSEX		27.0	0
CAMB-72A74	2020-03-24	2020-03-24	LONDON	CAMS000672	26.0	2
CAMB-77E91	2020-04-01	2020-04-02	HERTFORDSHIRE		14.0	0
CAMB-78B4E	2020-04-03	2020-04-04	LONDON		35.0	0
CAMB-77963	2020-03-30	2020-04-01	BEDFORDSHIRE		27.0	0
CAMB-724B2	2020-03-24	2020-03-25	CAMBRIDGESHIRE		27.0	0
CAMB-75E75	2020-03-29	2020-03-30	ESSEX		21.0	0
CAMB-75B7E	None	2020-03-30	ESSEX		24.0	0
CAMB-7683A	2020-03-30	2020-03-31	HERTFORDSHIRE		17.0	0
CAMB-7226D	2020-03-28	2020-03-29	BEDFORDSHIRE	CAMS001424	20.0	2
CAMB-7A98E	2020-04-03	2020-04-03	ESSEX		27.0	0
CAMB-770D7	2020-04-01	2020-04-02	ESSEX		22.0	0
CAMB-796A6	2020-04-03	2020-04-04	GREATER_LONDON		19.0	0
CAMB-7658E	2020-03-30	2020-03-30	ESSEX		27.0	0
CAMB-78F9D	2020-04-03	2020-04-04	ESSEX		16.0	0
CAMB-7965B	2020-04-03	2020-04-04	ESSEX		28.0	0
CAMB-77426	2020-04-01	2020-04-01	GREATER_LONDON		15.0	0
CAMB-72AB0	2020-03-22	2020-03-24	BUCKINGHAMSHIRE	CAMS000668	22.0	2
CAMB-7224F	2020-03-28	2020-03-29	HERTFORDSHIRE		26.0	0
CAMB-75EFD	2020-03-30	2020-03-30	HERTFORDSHIRE		24.0	0
CAMB-7B695	2020-04-04	2020-04-04	ESSEX		23.0	0
CAMB-7A766	2020-04-02	2020-04-03	GREATER_LONDON		24.0	0
CAMB-7A1A4	2020-04-02	2020-04-03	OTHER		30.0	0
CAMB-75C5D	2020-03-29	2020-03-30	SUFFOLK		29.0	0
CAMB-79864	2020-04-01	2020-04-02	BUCKINGHAMSHIRE		17.0	0
CAMB-794D9	2020-04-03	2020-04-04	ESSEX		25.0	0
CAMB-7903F	2020-04-03	2020-04-04	OTHER		27.0	0
CAMB-76603	2020-03-30	2020-03-30	ESSEX	CAMS001664	21.0	3
CAMB-7959A	2020-04-03	2020-04-04	GREATER_LONDON		27.0	0
CAMB-71D12	2020-03-30	2020-03-31	ESSEX		14.0	0
CAMB-7973A	2020-04-01	2020-04-02	BEDFORDSHIRE		18.0	0
CAMB-77BA9	2020-04-01	2020-04-02	HERTFORDSHIRE		25.0	0
CAMB-726AD	2020-03-23	2020-03-24	SUFFOLK		22.0	0
CAMB-76B6E	2020-03-29	2020-03-31	ESSEX		22.0	0
CAMB-75A26	2020-03-29	2020-03-30	ESSEX		23.0	0
CAMB-79EBD	2020-04-01	2020-04-03	BEDFORDSHIRE	CAMS000787	13.0	2
CAMB-75947	2020-03-30	2020-04-01	BEDFORDSHIRE		21.0	0
CAMB-77E37	2020-04-03	2020-04-04	SUFFOLK		16.0	0
CAMB-78179	2020-04-02	2020-04-02	GREATER_LONDON		24.0	0
CAMB-79521	2020-04-03	2020-04-04	BEDFORDSHIRE		27.0	0
CAMB-7A6E1	2020-04-03	2020-04-03	HERTFORDSHIRE		27.0	0
CAMB-72AED	2020-03-22	2020-03-24	BEDFORDSHIRE		31.0	0
CAMB-75DB4	2020-03-29	2020-03-30	HERTFORDSHIRE		23.0	0
CAMB-75B14	2020-03-29	2020-03-30	ESSEX		23.0	0
CAMB-7A1FF	2020-04-01	2020-04-03	ESSEX		24.0	0
CAMB-761E4	2020-03-30	2020-03-30	BEDFORDSHIRE	CAMS001424	19.0	2
CAMB-71E97	2020-03-29	2020-03-29	BEDFORDSHIRE		17.0	0
CAMB-77E0A	2020-04-01	2020-04-02	ESSEX		23.0	0
CAMB-72625	2020-03-22	2020-03-24	CAMBRIDGESHIRE		23.0	0
CAMB-78E90	2020-04-02	2020-04-04	BEDFORDSHIRE		35.0	0
CAMB-71CCA	2020-03-30	2020-03-31	BUCKINGHAMSHIRE		22.0	0
CAMB-75D3C	2020-03-28	2020-03-30			31.0	0
CAMB-770E6	2020-03-31	2020-04-02	ESSEX		30.0	0
CAMB-77CC4	2020-04-01	2020-04-02	ESSEX		15.0	0
CAMB-7A0D4	2020-04-02	2020-04-03	LONDON		16.0	0
CAMB-77338	2020-04-01	2020-04-01	BEDFORDSHIRE		31.0	0
CAMB-770F5	2020-04-01	2020-04-02	ESSEX		22.0	0
CAMB-722D6	2020-03-28	2020-03-29	LONDON		24.0	0
CAMB-7A960	2020-04-03	2020-04-03	BEDFORDSHIRE		28.0	0
CAMB-75DE1	2020-03-29	2020-03-30	HERTFORDSHIRE		30.0	0
CAMB-77A15	2020-04-01	2020-04-02	GREATER_LONDON		17.0	0
CAMB-79B6B	2020-04-02	2020-04-03	ESSEX		14.0	0
CAMB-7905D	2020-04-03	2020-04-04	ESSEX		20.0	0
CAMB-759A1	2020-03-31	2020-04-01	ESSEX		27.0	0
CAMB-77F43	2020-04-02	2020-04-02	HERTFORDSHIRE		27.0	0
CAMB-780A9	2020-04-01	2020-04-02	LONDON		28.0	0
CAMB-721D9	2020-03-28	2020-03-29	HERTFORDSHIRE		14.0	0
CAMB-771F2	2020-03-31	2020-04-02	ESSEX		24.0	0
CAMB-78AF6	2020-04-03	2020-04-04	ESSEX	CAMS002480	26.0	2
CAMB-727AA	2020-03-23	2020-03-24	GREATER_LONDON		32.0	0
CAMB-77BE5	2020-04-01	2020-04-02	HERTFORDSHIRE		30.0	0
CAMB-78DB1	2020-04-02	2020-04-04	ESSEX		17.0	0
CAMB-75A35	2020-03-28	2020-03-30	BEDFORDSHIRE		28.0	0
CAMB-71CBB	2020-03-30	2020-03-31	BUCKINGHAMSHIRE		16.0	0
CAMB-7966A	2020-04-03	2020-04-04	HERTFORDSHIRE		16.0	0
CAMB-7A344	2020-04-02	2020-04-03	ESSEX		30.0	0
CAMB-72573	2020-03-23	2020-03-24	CAMBRIDGESHIRE		22.0	0
CAMB-7233D	2020-03-25	2020-03-27	BUCKINGHAMSHIRE		29.0	0
CAMB-720BE	2020-03-28	2020-03-29	ESSEX		25.0	0
CAMB-79F41	2020-04-02	2020-04-03	ESSEX	CAMS002412	23.0	2
CAMB-77936	2020-03-31	2020-04-01	ESSEX		29.0	0
CAMB-7922A	2020-04-03	2020-04-04	ESSEX		23.0	0
CAMB-75EEE	2020-03-29	2020-03-30	HERTFORDSHIRE		29.0	0
CAMB-767A6	2020-03-30	2020-03-31	CAMBRIDGESHIRE	CAMS001715	26.0	4
CAMB-79011	2020-04-03	2020-04-04	ESSEX		19.0	0
CAMB-75A80	2020-03-29	2020-03-30	ESSEX		13.0	0
CAMB-77A8E	2020-03-31	2020-04-02	BUCKINGHAMSHIRE		18.0	0
CAMB-75E39	2020-03-29	2020-03-30	ESSEX		20.0	0
CAMB-76515	2020-03-29	2020-03-30	ESSEX		24.0	0
CAMB-72221	2020-03-28	2020-03-29	HERTFORDSHIRE		20.0	0
CAMB-7A48D	2020-04-02	2020-04-03	LONDON		25.0	0
CAMB-72ACF	2020-03-22	2020-03-24	BEDFORDSHIRE		22.0	0
CAMB-76C2F	2020-03-30	2020-03-31	LONDON		21.0	0
CAMB-72801	2020-03-23	2020-03-24	ESSEX		26.0	0
CAMB-77EBF	2020-04-01	2020-04-02	GREATER_LONDON		21.0	0
CAMB-77F25	2020-04-01	2020-04-02	GREATER_LONDON		30.0	0
CAMB-76BB9	2020-03-30	2020-03-31	ESSEX		27.0	0
CAMB-77453	2020-03-31	2020-04-01	ESSEX		27.0	0
CAMB-71B54	2020-03-30	2020-04-01	CAMBRIDGESHIRE		21.0	0
CAMB-760D8	2020-03-30	2020-03-30	HERTFORDSHIRE		29.0	0
CAMB-75929	2020-03-31	2020-04-01	ESSEX	CAMS001910	21.0	2
CAMB-7292C	2020-03-22	2020-03-24	ESSEX		17.0	0
CAMB-7A854	2020-04-02	2020-04-03	GREATER_LONDON		23.0	0
CAMB-71C60	2020-03-31	2020-03-31	ESSEX		25.0	0
CAMB-7A177	2020-04-01	2020-04-03	LONDON		15.0	0
CAMB-77918	2020-03-31	2020-04-01	ESSEX		21.0	0
CAMB-794F7	2020-04-03	2020-04-04	BEDFORDSHIRE		21.0	0
CAMB-72616	2020-03-23	2020-03-24	ESSEX		17.0	0
CAMB-7A4C9	2020-04-02	2020-04-03	ESSEX		15.0	0
CAMB-7607E	2020-03-30	2020-03-30	GREATER_LONDON		24.0	0
CAMB-79828	2020-04-01	2020-04-02	BEDFORDSHIRE		29.0	0
CAMB-71C42	2020-03-31	2020-04-01	SUFFOLK	CAMS001914	23.0	3
CAMB-75A08	2020-03-29	2020-03-30	ESSEX		26.0	0
CAMB-727E6	2020-03-23	2020-03-24	GREATER_LONDON		28.0	0
CAMB-720FA	2020-03-28	2020-03-29	ESSEX	CAMS001225	24.0	1
CAMB-7672E	2020-03-30	2020-03-31	HERTFORDSHIRE		28.0	0
CAMB-77383	2020-03-31	2020-04-01	GREATER_LONDON		15.0	0
CAMB-72722	2020-03-23	2020-03-24	ESSEX		15.0	0
CAMB-79BB6	2020-04-01	2020-04-03	ESSEX		26.0	0
CAMB-79E53	2020-04-01	2020-04-03	BEDFORDSHIRE		28.0	0
CAMB-7A99D	2020-04-02	2020-04-03	BEDFORDSHIRE	CAMS002595	29.0	1
CAMB-776C6	2020-03-31	2020-04-01	GREATER_LONDON		10.0	0
CAMB-79891	2020-04-01	2020-04-02	ESSEX		23.0	0
CAMB-7A12C	None	2020-04-03	LONDON		24.0	0
CAMB-722C7	2020-03-28	2020-03-29	GREATER_LONDON		13.0	0
CAMB-7913C	2020-04-03	2020-04-04	ESSEX	CAMS002667	19.0	2
CAMB-7A872	2020-04-02	2020-04-03	GREATER_LONDON		17.0	0
CAMB-7971C	2020-04-04	2020-04-04	GREATER_LONDON		23.0	0
CAMB-79916	2020-04-01	2020-04-02	BEDFORDSHIRE	CAMS002328	21.0	2
CAMB-71EA6	2020-03-28	2020-03-29	BEDFORDSHIRE		18.0	0
CAMB-72652	2020-03-24	2020-03-24	CAMBRIDGESHIRE	CAMS000740	26.0	1
CAMB-728F2	2020-03-23	2020-03-24	ESSEX		27.0	0
CAMB-79E80	2020-04-02	2020-04-03	LONDON		26.0	0
CAMB-7A46F	2020-04-02	2020-04-03	ESSEX		15.0	0
CAMB-762F0	2020-03-29	2020-03-30	LONDON		23.0	0
CAMB-79846	2020-04-01	2020-04-02	BUCKINGHAMSHIRE		14.0	0
CAMB-79DB0	2020-04-02	2020-04-03	ESSEX		25.0	0
CAMB-77BC7	2020-04-01	2020-04-02	HERTFORDSHIRE		29.0	0
CAMB-79D1A	2020-04-02	2020-04-03	HERTFORDSHIRE		32.0	0
CAMB-762B4	2020-03-29	2020-03-30	BEDFORDSHIRE		29.0	0
CAMB-722E5	2020-03-28	2020-03-29	ESSEX		23.0	0
CAMB-77505	2020-04-01	2020-04-01	ESSEX		22.0	0
CAMB-79530	2020-04-03	2020-04-04	ESSEX		28.0	0
CAMB-79D74	2020-04-02	2020-04-03	LONDON		24.0	0
CAMB-78CA5	2020-04-03	2020-04-04	ESSEX		22.0	0
CAMB-7B61D	2020-04-04	2020-04-04	HERTFORDSHIRE		18.0	0
CAMB-77A7F	2020-04-01	2020-04-02	GREATER_LONDON		24.0	0
CAMB-791B4	2020-04-03	2020-04-04	SUFFOLK		16.0	0
CAMB-77D2B	2020-04-01	2020-04-02	BEDFORDSHIRE		17.0	0
CAMB-720DC	2020-03-28	2020-03-29	HERTFORDSHIRE		27.0	0
CAMB-78C0F	2020-04-03	2020-04-04	ESSEX		20.0	0
CAMB-79679	2020-04-03	2020-04-04	ESSEX		27.0	0
CAMB-71DA9	2020-03-31	2020-03-31	SUFFOLK	CAMS001867	22.0	4
CAMB-77A9D	2020-03-31	2020-04-02	GREATER_LONDON		18.0	0
CAMB-798CE	2020-04-01	2020-04-02	BEDFORDSHIRE		26.0	0
CAMB-79020	2020-04-03	2020-04-04	ESSEX		17.0	0
CAMB-79415	2020-04-03	2020-04-04	BUCKINGHAMSHIRE		23.0	0
CAMB-71FFE	2020-03-28	2020-03-29	ESSEX		31.0	0
CAMB-77D67	2020-04-02	2020-04-02	ESSEX		30.0	0
CAMB-72045	2020-03-28	2020-03-29	ESSEX		24.0	0
CAMB-78D2A	2020-04-03	2020-04-04	HERTFORDSHIRE		25.0	0
CAMB-76445	2020-03-30	2020-03-30	ESSEX		25.0	0
CAMB-76269	2020-03-30	2020-03-30	ESSEX	CAMS001666	14.0	2
CAMB-729FF	2020-03-22	2020-03-24	ESSEX		23.0	0
CAMB-777F0	2020-04-01	2020-04-01	ESSEX		18.0	0
CAMB-7A04D	2020-04-02	2020-04-03	ESSEX		23.0	0
CAMB-779DC	2020-03-31	2020-04-01	BEDFORDSHIRE		28.0	0
CAMB-72564	2020-03-21	2020-03-24	CAMBRIDGESHIRE		29.0	0
CAMB-79099	2020-04-04	2020-04-04	HERTFORDSHIRE		28.0	0
CAMB-75DC3	2020-03-29	2020-03-30	GREATER_LONDON		24.0	0
CAMB-779CD	2020-03-31	2020-04-01	BEDFORDSHIRE		13.0	0
CAMB-791D2	2020-04-03	2020-04-04	SUFFOLK		19.0	0
CAMB-77C1F	2020-04-03	2020-04-04	GREATER_LONDON	CAMS002472	17.0	2
CAMB-79372	2020-04-03	2020-04-04	HERTFORDSHIRE		27.0	0
CAMB-778B1	2020-03-31	2020-04-01	ESSEX		20.0	0
CAMB-7A0A7	2020-04-02	2020-04-03	ESSEX		22.0	0
CAMB-7A283	None	2020-04-03	ESSEX		22.0	0
CAMB-77A24	2020-04-01	2020-04-02	HERTFORDSHIRE		26.0	0
CAMB-7958B	2020-04-03	2020-04-04	HERTFORDSHIRE		24.0	0
CAMB-76506	2020-03-29	2020-03-30	ESSEX		16.0	0
CAMB-76E0B	2020-03-31	2020-04-02	SUFFOLK	CAMS001914	29.0	3
CAMB-76AAD	2020-03-29	2020-03-31	ESSEX		20.0	0
CAMB-79E17	2020-04-02	2020-04-03	HERTFORDSHIRE		22.0	0
CAMB-765F7	2020-03-30	2020-03-30	HERTFORDSHIRE		24.0	0
CAMB-7A9D9	2020-04-03	2020-04-03	BEDFORDSHIRE		29.0	0
CAMB-76919	2020-03-30	2020-03-31	HERTFORDSHIRE		26.0	0
CAMB-798DD	2020-04-01	2020-04-02	BEDFORDSHIRE		30.0	0
CAMB-77AE8	2020-03-31	2020-04-02	HERTFORDSHIRE	CAMS002128	25.0	2
CAMB-79767	2020-04-02	2020-04-02	HERTFORDSHIRE		16.0	0
CAMB-79248	2020-04-03	2020-04-04	ESSEX	CAMS002718	24.0	1
CAMB-7A57B	2020-04-02	2020-04-03	ESSEX		12.0	0
CAMB-7A0C5	2020-04-02	2020-04-03	ESSEX		20.0	0
CAMB-76D0E	2020-03-30	2020-03-31	SUFFOLK	CAMS001710	24.0	1
CAMB-78CB4	2020-04-03	2020-04-04	GREATER_LONDON	CAMS002279	25.0	2
CAMB-7227C	None	None	None		None	0
CAMB-79ECC	2020-04-01	2020-04-03	LONDON		30.0	0
CAMB-71B63	2020-03-30	2020-04-01	SUFFOLK		22.0	0
CAMB-72A65	2020-03-24	2020-03-24	CAMBRIDGESHIRE		21.0	0
CAMB-7217F	2020-03-28	2020-03-29	GREATER_LONDON		27.0	0
CAMB-796B5	2020-04-03	2020-04-04	CAMBRIDGESHIRE	CAMS002781	24.0	1
CAMB-76A16	2020-03-30	2020-03-31	ESSEX		22.0	0
CAMB-7A53F	2020-04-02	2020-04-03	ESSEX		30.0	0
CAMB-726BC	2020-03-23	2020-03-24			21.0	0
CAMB-780D6	2020-04-01	2020-04-02	GREATER_LONDON		25.0	0
CAMB-764DC	2020-03-30	2020-03-30	GREATER_LONDON		26.0	0
CAMB-7812E	2020-04-01	2020-04-02	ESSEX		27.0	0
CAMB-7A247	2020-04-02	2020-04-03	ESSEX		16.0	0
CAMB-71BFA	2020-03-31	2020-04-01	GREATER_LONDON		23.0	0
CAMB-76339	2020-03-28	2020-03-30	ESSEX		26.0	0
CAMB-79837	2020-04-01	2020-04-02	SUFFOLK	CAMS002325	25.0	2
CAMB-78FAC	2020-04-04	2020-04-04	HERTFORDSHIRE		21.0	0
CAMB-79749	2020-04-01	2020-04-02	BEDFORDSHIRE		18.0	0
CAMB-7674C	2020-03-30	2020-03-31	HERTFORDSHIRE	CAMS000355	28.0	1
CAMB-7680D	2020-03-30	2020-03-31	ESSEX		28.0	0
CAMB-79FBA	2020-04-02	2020-04-03	OTHER		26.0	0
CAMB-72AFC	2020-03-23	2020-03-24	BEDFORDSHIRE		29.0	0
CAMB-7285C	2020-03-22	2020-03-24	ESSEX		29.0	0
CAMB-72485	2020-03-24	2020-03-24	CAMBRIDGESHIRE		27.0	0
CAMB-797EF	2020-04-01	2020-04-02	BEDFORDSHIRE	CAMS002328	26.0	2
CAMB-71FD0	2020-03-27	2020-03-29	ESSEX		22.0	0
CAMB-798A0	2020-04-01	2020-04-02	BUCKINGHAMSHIRE		19.0	0
CAMB-7A47E	2020-04-02	2020-04-03	HERTFORDSHIRE		25.0	0
CAMB-7A818	2020-04-03	2020-04-03	HERTFORDSHIRE		22.0	0
CAMB-7A7FD	2020-04-02	2020-04-03	GREATER_LONDON		29.0	0
CAMB-729D1	2020-03-23	2020-03-24	HERTFORDSHIRE		23.0	0
CAMB-724EF	2020-03-21	2020-03-24	CAMBRIDGESHIRE		30.0	0
CAMB-724D0	2020-03-21	2020-03-24	CAMBRIDGESHIRE		27.0	0
CAMB-7A687	2020-04-02	2020-04-03	BUCKINGHAMSHIRE		24.0	0
CAMB-7617B	2020-03-30	2020-03-30	HERTFORDSHIRE	CAMS001604	19.0	2
CAMB-71B36	2020-03-31	2020-04-01	BEDFORDSHIRE	CAMS000919	30.0	2
CAMB-724FE	2020-03-21	2020-03-24	CAMBRIDGESHIRE		28.0	0
CAMB-75B9C	2020-03-28	2020-03-30	BEDFORDSHIRE		26.0	0
CAMB-79257	2020-04-03	2020-04-04	BEDFORDSHIRE		28.0	0
CAMB-71BCD	2020-03-30	2020-04-01	GREATER_LONDON		27.0	0
CAMB-78B5D	2020-04-03	2020-04-04	OTHER		29.0	0
CAMB-7A5B7	2020-04-02	2020-04-03	SUFFOLK		19.0	0
CAMB-76876	2020-03-29	2020-03-31	SUFFOLK		27.0	0
CAMB-769A0	2020-03-30	2020-03-31	ESSEX	CAMS001664	23.0	3
CAMB-7283E	2020-03-23	2020-03-24	GREATER_LONDON	CAMS000245	26.0	1
CAMB-7915A	2020-04-03	2020-04-04	ESSEX		20.0	0
CAMB-760AB	2020-03-30	2020-03-31	ESSEX		22.0	0
CAMB-78DDF	2020-04-02	2020-04-04	BEDFORDSHIRE		22.0	0
CAMB-71C33	2020-03-31	2020-04-01	SUFFOLK		27.0	0
CAMB-76621	2020-03-29	2020-03-30	ESSEX		22.0	0
CAMB-78C78	2020-04-03	2020-04-04	GREATER_LONDON		28.0	0
CAMB-77FE9	2020-04-01	2020-04-02	HERTFORDSHIRE		26.0	0
CAMB-7276E	2020-03-23	2020-03-24	GREATER_LONDON		24.0	0
CAMB-7A256	None	None	None		None	0
CAMB-71F94	2020-03-29	2020-03-29	HERTFORDSHIRE		25.0	0
CAMB-7A58A	2020-04-02	2020-04-03	BUCKINGHAMSHIRE		29.0	0
CAMB-71F3A	2020-03-28	2020-03-29	LONDON		20.0	0
CAMB-7B686	2020-04-03	2020-04-04	SUFFOLK	CAMS002532	17.0	2
CAMB-7A0B6	2020-04-02	2020-04-03	OTHER		29.0	0
CAMB-77839	2020-03-31	2020-04-01	ESSEX		21.0	0
CAMB-77268	2020-04-01	2020-04-02	ESSEX	CAMS002015	23.0	2
CAMB-773CF	2020-03-31	2020-04-01	ESSEX		16.0	0
CAMB-72959	2020-03-23	2020-03-24	ESSEX		24.0	0
CAMB-79424	2020-04-04	2020-04-04	ESSEX		20.0	0
CAMB-76B5F	2020-03-31	2020-03-31	HERTFORDSHIRE		27.0	0
CAMB-7B659	2020-04-02	2020-04-04	ESSEX		31.0	0
CAMB-76B04	2020-03-30	2020-03-31	SUFFOLK	CAMS001390	19.0	1
CAMB-79F7E	2020-04-02	2020-04-03	HERTFORDSHIRE		24.0	0
CAMB-777E1	2020-03-31	2020-04-01	ESSEX		23.0	0
CAMB-790C6	2020-04-03	2020-04-04	ESSEX		25.0	0
CAMB-76ADA	2020-03-29	2020-03-31	ESSEX	CAMS001257	22.0	1
CAMB-77D1C	2020-04-02	2020-04-02	HERTFORDSHIRE		25.0	0
CAMB-77CE2	2020-04-01	2020-04-02	HERTFORDSHIRE		25.0	0
CAMB-771B6	2020-03-31	2020-04-02	ESSEX		19.0	0
CAMB-7A168	None	2020-04-03	ESSEX		26.0	0
CAMB-76964	2020-03-27	2020-03-31	LONDON		29.0	0
CAMB-780B8	2020-04-01	2020-04-02	HERTFORDSHIRE		28.0	0
CAMB-75A53	2020-03-28	2020-03-30	BEDFORDSHIRE		31.0	0
CAMB-76348	2020-03-28	2020-03-30	LONDON		28.0	0
CAMB-77B03	2020-04-01	2020-04-02	BUCKINGHAMSHIRE		29.0	0
CAMB-725DD	2020-03-24	2020-03-24	ESSEX		24.0	0
CAMB-75ACC	2020-03-30	2020-03-30	CAMBRIDGESHIRE	CAMS001552	27.0	2
CAMB-7A001	None	2020-04-03	ESSEX		14.0	0
CAMB-7243A	2020-03-24	2020-03-24	ESSEX		31.0	0
CAMB-7284D	2020-03-23	2020-03-24	ESSEX		20.0	0
CAMB-795D6	2020-04-03	2020-04-04	ESSEX	CAMS002792	25.0	1
CAMB-77769	2020-03-31	2020-04-01	BEDFORDSHIRE		24.0	0
CAMB-78C1E	2020-04-03	2020-04-04	GREATER_LONDON		25.0	0
CAMB-7775A	2020-03-30	2020-03-31	HERTFORDSHIRE		26.0	0
CAMB-76E65	2020-04-01	2020-04-02	LONDON		23.0	0
CAMB-76366	2020-03-30	2020-03-30	ESSEX		22.0	0
CAMB-7A71B	2020-04-03	2020-04-03	HERTFORDSHIRE		21.0	0
CAMB-771E3	2020-04-01	2020-04-02	ESSEX		29.0	0
CAMB-761B7	2020-03-29	2020-03-30	BEDFORDSHIRE		33.0	0
CAMB-77C88	2020-04-01	2020-04-02	ESSEX		24.0	0
CAMB-76418	2020-03-29	2020-03-30	HERTFORDSHIRE		28.0	0
CAMB-7731A	2020-03-30	2020-04-01	ESSEX		26.0	0
CAMB-72230	2020-03-28	2020-03-29	BEDFORDSHIRE		25.0	0
CAMB-794CA	2020-04-02	2020-04-04	BEDFORDSHIRE		28.0	0
CAMB-76287	2020-03-27	2020-03-30	LONDON		20.0	0
CAMB-727D7	2020-03-23	2020-03-24	ESSEX	CAMS000518	30.0	1
CAMB-723E2	2020-03-24	2020-03-24	SUFFOLK	CAMS000737	18.0	2
CAMB-71E88	2020-03-29	2020-03-30	CAMBRIDGESHIRE	CAMS001366	26.0	1
CAMB-7A362	2020-04-03	2020-04-03	ESSEX	CAMS002480	21.0	2
CAMB-7749F	2020-03-31	2020-04-01	BUCKINGHAMSHIRE		25.0	0
CAMB-795A9	2020-04-03	2020-04-04	HERTFORDSHIRE		27.0	0
CAMB-72388	2020-03-23	2020-03-24	BEDFORDSHIRE		29.0	0
CAMB-71B81	2020-03-31	2020-04-01	HERTFORDSHIRE		21.0	0
CAMB-7A784	2020-04-02	2020-04-03	GREATER_LONDON		26.0	0
CAMB-774AE	2020-03-31	2020-04-01	GREATER_LONDON		24.0	0
CAMB-76E29	2020-04-01	2020-04-02	SUFFOLK		28.0	0
CAMB-768FE	2020-03-29	2020-03-31	SUFFOLK		21.0	0
CAMB-77A42	2020-03-31	2020-04-02	BUCKINGHAMSHIRE	CAMS002135	17.0	2
CAMB-7232E	None	2020-03-28	HERTFORDSHIRE		29.0	0
CAMB-721CA	2020-03-28	2020-03-29	GREATER_LONDON		25.0	0
CAMB-76C7A	2020-03-31	2020-03-31	HERTFORDSHIRE		28.0	0
CAMB-77B6D	2020-04-01	2020-04-02	HERTFORDSHIRE		26.0	0
CAMB-75C8A	2020-03-29	2020-03-30	SUFFOLK	CAMS001538	22.0	2
CAMB-766C7	2020-03-30	2020-03-31	ESSEX		27.0	0
CAMB-77F34	2020-04-01	2020-04-02	CAMBRIDGESHIRE	CAMS001932	25.0	2
CAMB-728D4	2020-03-23	2020-03-24	ESSEX		24.0	0
CAMB-78BD5	2020-04-03	2020-04-04	ESSEX		23.0	0
CAMB-76C01	2020-03-29	2020-03-31	ESSEX		19.0	0
CAMB-75D96	2020-03-29	2020-03-30	GREATER_LONDON		25.0	0
CAMB-722A9	2020-03-28	2020-03-29	BEDFORDSHIRE		26.0	0
CAMB-76797	2020-03-30	2020-03-31	HERTFORDSHIRE		29.0	0
CAMB-7A159	None	2020-04-03	LONDON	CAMS002458	25.0	2
CAMB-75BE7	2020-03-28	2020-03-30	ESSEX		18.0	0
CAMB-71E3D	2020-03-29	2020-03-30	CAMBRIDGESHIRE		22.0	0
CAMB-7B5C5	2020-04-04	2020-04-04	ESSEX		27.0	0
CAMB-75DF0	2020-03-29	2020-03-30	HERTFORDSHIRE		19.0	0
CAMB-729A4	2020-03-23	2020-03-24	SUFFOLK		24.0	0
CAMB-78F7F	2020-04-03	2020-04-04	ESSEX		26.0	0
CAMB-75F36	2020-03-29	2020-03-30	ESSEX		29.0	0
CAMB-72A1A	2020-03-23	2020-03-24	HERTFORDSHIRE		27.0	0
CAMB-76858	2020-03-29	2020-03-31	SUFFOLK	CAMS001289	24.0	1
CAMB-76B40	2020-03-30	2020-03-31	BEDFORDSHIRE		26.0	0
CAMB-79442	2020-04-03	2020-04-04	ESSEX	CAMS002761	28.0	2
CAMB-7A3EA	2020-04-02	2020-04-03	ESSEX		19.0	0
CAMB-795C7	2020-04-03	2020-04-04	GREATER_LONDON		21.0	0
CAMB-791C3	2020-04-03	2020-04-04	ESSEX		22.0	0
CAMB-768D0	2020-03-30	2020-03-31	HERTFORDSHIRE		21.0	0
CAMB-79CFF	2020-04-02	2020-04-03	ESSEX		30.0	0
CAMB-79B4D	2020-04-02	2020-04-03	ESSEX		23.0	0
CAMB-796C4	2020-04-03	2020-04-04	GREATER_LONDON		25.0	0
CAMB-76B7D	2020-03-30	2020-03-31	HERTFORDSHIRE		28.0	0
CAMB-7782A	2020-03-31	2020-04-01	BEDFORDSHIRE		21.0	0
CAMB-79BD4	2020-04-01	2020-04-03	ESSEX		27.0	0
CAMB-7A335	2020-04-02	2020-04-03	ESSEX		17.0	0
CAMB-75C11	2020-03-29	2020-03-30	SUFFOLK		28.0	0
CAMB-79873	2020-04-01	2020-04-02	SUFFOLK		19.0	0
CAMB-72704	2020-03-23	2020-03-24	ESSEX	CAMS000727	19.0	1
CAMB-791F0	2020-04-03	2020-04-04	LONDON		25.0	0
CAMB-76375	2020-03-28	2020-03-30	ESSEX		26.0	0
CAMB-75D0F	2020-03-29	2020-03-30	CAMBRIDGESHIRE		26.0	0
CAMB-79BE3	2020-04-01	2020-04-03	OTHER	CAMS002108	31.0	1
CAMB-79EF9	2020-04-02	2020-04-03	ESSEX		23.0	0
CAMB-769BF	2020-03-30	2020-03-31	GREATER_LONDON		16.0	0
CAMB-7906C	2020-04-03	2020-04-04	ESSEX		27.0	0
CAMB-78D75	2020-04-03	2020-04-04	ESSEX		25.0	0
CAMB-7720E	None	2020-04-02	ESSEX		26.0	0
CAMB-7A21A	2020-04-02	2020-04-03	ESSEX		25.0	0
CAMB-77B5E	2020-03-31	2020-04-02	ESSEX		24.0	0
CAMB-71EB5	2020-03-28	2020-03-29	LONDON		13.0	0
CAMB-774BD	2020-03-31	2020-04-01	ESSEX		20.0	0
CAMB-76102	2020-03-30	2020-03-31	ESSEX		20.0	0
CAMB-77532	2020-03-31	2020-04-01	ESSEX		26.0	0
CAMB-775F6	2020-03-31	2020-04-01	BEDFORDSHIRE		23.0	0
CAMB-761F3	2020-03-30	2020-03-30	BEDFORDSHIRE		30.0	0
CAMB-7912D	2020-04-03	2020-04-04	ESSEX		23.0	0
CAMB-76B8C	2020-03-29	2020-03-31	ESSEX		17.0	0
CAMB-7768A	2020-04-01	2020-04-01	LONDON		24.0	0
CAMB-75E0C	2020-03-29	2020-03-30			29.0	0
CAMB-75EB1	2020-03-29	2020-03-30	HERTFORDSHIRE		27.0	0
CAMB-72591	2020-03-24	2020-03-24	HERTFORDSHIRE		21.0	0
CAMB-797A3	2020-04-02	2020-04-02	BEDFORDSHIRE		29.0	0
CAMB-726DA	2020-03-23	2020-03-24	ESSEX		16.0	0
CAMB-7A010	2020-04-02	2020-04-03	SUFFOLK		28.0	0
CAMB-7236A	2020-03-23	2020-03-24	BEDFORDSHIRE	CAMS000787	20.0	2
CAMB-76481	2020-03-30	2020-03-30	ESSEX		18.0	0
CAMB-7A9CA	None	2020-04-03	SUFFOLK		30.0	0
CAMB-77198	2020-04-01	2020-04-02	ESSEX		21.0	0
CAMB-78F60	2020-04-03	2020-04-04	ESSEX	CAMS002690	27.0	1
CAMB-78B20	2020-04-04	2020-04-04	HERTFORDSHIRE		29.0	0
CAMB-7268F	2020-03-23	2020-03-24	SUFFOLK	CAMS000737	27.0	2
CAMB-79503	2020-04-03	2020-04-04	BUCKINGHAMSHIRE		22.0	0
CAMB-7781B	None	2020-04-01	ESSEX		14.0	0
CAMB-78DEE	2020-04-02	2020-04-04	HERTFORDSHIRE	CAMS001997	16.0	2
CAMB-75FFA	2020-03-28	2020-03-30	ESSEX		28.0	0
CAMB-7B677	2020-04-03	2020-04-04	ESSEX		18.0	0
CAMB-71D7C	2020-03-31	2020-03-31	HERTFORDSHIRE		22.0	0
CAMB-75D1E	2020-03-29	2020-03-30	ESSEX	CAMS001583	15.0	1
CAMB-772C2	2020-03-31	2020-04-01	CAMBRIDGESHIRE		29.0	0
CAMB-77B30	2020-03-31	2020-04-02	ESSEX		21.0	0
CAMB-792EE	2020-04-03	2020-04-04	ESSEX		26.0	0
CAMB-7A20B	2020-04-01	2020-04-03	ESSEX	CAMS001670	21.0	2
CAMB-75F90	2020-03-28	2020-03-30	ESSEX		13.0	0
CAMB-76023	2020-03-28	2020-03-30	ESSEX		19.0	0
CAMB-7911E	2020-04-03	2020-04-04	OTHER	CAMS002715	18.0	2
CAMB-7A450	2020-04-01	2020-04-03	BUCKINGHAMSHIRE		28.0	0
CAMB-76409	2020-03-30	2020-03-30	ESSEX		23.0	0
CAMB-75ABD	2020-03-29	2020-03-30	BEDFORDSHIRE		13.0	0
CAMB-766D6	2020-03-30	2020-03-31	GREATER_LONDON		20.0	0
CAMB-79CD1	2020-04-02	2020-04-03	HERTFORDSHIRE		28.0	0
CAMB-72476	2020-03-21	2020-03-24	CAMBRIDGESHIRE		30.0	0
CAMB-75CF3	2020-03-30	2020-03-30	CAMBRIDGESHIRE		25.0	0
CAMB-76885	2020-03-30	2020-03-31	ESSEX		28.0	0
CAMB-7615D	2020-03-30	2020-03-30	BEDFORDSHIRE		29.0	0
CAMB-760C9	2020-03-30	2020-03-31			16.0	0
CAMB-75AEA	2020-03-30	2020-03-30	CAMBRIDGESHIRE		29.0	0
CAMB-7A511	2020-04-01	2020-04-03	ESSEX		21.0	0
CAMB-78EEB	2020-04-02	2020-04-04	BEDFORDSHIRE		26.0	0
CAMB-77462	2020-04-01	2020-04-01	GREATER_LONDON		24.0	0
CAMB-78C4B	2020-04-02	2020-04-04	ESSEX		19.0	0
CAMB-794AC	2020-04-03	2020-04-04	OTHER	CAMS002715	27.0	2
CAMB-766F4	2020-03-30	2020-03-31	GREATER_LONDON		28.0	0
CAMB-7293B	2020-03-21	2020-03-24	ESSEX		32.0	0
CAMB-7A10E	None	2020-04-03	LONDON		27.0	0
CAMB-7A0E3	2020-04-01	2020-04-03	ESSEX		22.0	0
CAMB-78CE1	2020-04-03	2020-04-04	ESSEX		27.0	0
CAMB-75BBA	2020-03-29	2020-03-30	SUFFOLK		18.0	0
CAMB-7A02F	2020-04-02	2020-04-03	ESSEX		21.0	0
CAMB-7A4E7	2020-04-02	2020-04-03	ESSEX		26.0	0
CAMB-7A4D8	2020-04-01	2020-04-03	ESSEX	CAMS002505	27.0	1
CAMB-7A1D1	2020-04-01	2020-04-03	ESSEX	CAMS002435	21.0	2
CAMB-76AE9	2020-03-30	2020-03-31	BUCKINGHAMSHIRE		14.0	0
CAMB-71D8B	2020-03-31	2020-03-31	BUCKINGHAMSHIRE		17.0	0
CAMB-7721D	2020-03-31	2020-04-02			31.0	0
CAMB-72995	2020-03-23	2020-03-24			18.0	0
CAMB-76472	2020-03-30	2020-03-30	HERTFORDSHIRE		27.0	0
CAMB-75AF9	2020-03-29	2020-03-30	BEDFORDSHIRE		19.0	0
CAMB-75F72	2020-03-28	2020-03-30	ESSEX		28.0	0
CAMB-78E27	2020-04-03	2020-04-04	BEDFORDSHIRE		30.0	0
CAMB-75938	2020-03-31	2020-04-01	ESSEX		26.0	0
CAMB-72810	2020-03-23	2020-03-24	GREATER_LONDON		19.0	0
CAMB-72072	2020-03-28	2020-03-29	CAMBRIDGESHIRE	CAMS001426	26.0	1
CAMB-77E28	2020-04-01	2020-04-02	ESSEX		18.0	0
CAMB-77F8F	2020-03-31	2020-04-02	ESSEX		28.0	0
CAMB-78CC3	2020-04-03	2020-04-04	ESSEX		27.0	0
CAMB-7A61E	2020-04-02	2020-04-03	SUFFOLK	CAMS002532	30.0	2
CAMB-77EDD	2020-04-01	2020-04-02	HERTFORDSHIRE		25.0	0
CAMB-7920C	2020-04-03	2020-04-04	ESSEX		22.0	0
CAMB-78C2D	2020-04-03	2020-04-04	ESSEX	CAMS002667	27.0	2
CAMB-791A5	2020-04-03	2020-04-04	ESSEX		21.0	0
CAMB-72537	2020-03-23	2020-03-24	CAMBRIDGESHIRE		21.0	0
CAMB-71E79	2020-03-29	2020-03-29	BEDFORDSHIRE		23.0	0
CAMB-7963D	2020-04-03	2020-04-04	LONDON		25.0	0
CAMB-78BF3	2020-04-03	2020-04-04	HERTFORDSHIRE		29.0	0
CAMB-79363	2020-04-03	2020-04-04	SUFFOLK		19.0	0
CAMB-79D0B	2020-04-02	2020-04-03	SUFFOLK		19.0	0
CAMB-76E83	2020-04-01	2020-04-02	SUFFOLK		15.0	0
CAMB-7219D	2020-03-28	2020-03-29	HERTFORDSHIRE		24.0	0
CAMB-75A17	2020-03-28	2020-03-30			19.0	0
CAMB-75FCD	2020-03-29	2020-03-30	HERTFORDSHIRE		19.0	0
CAMB-7659D	2020-03-30	2020-03-30	CAMBRIDGESHIRE		24.0	0
CAMB-77374	2020-04-01	2020-04-01	BEDFORDSHIRE		25.0	0
CAMB-76A70	2020-03-30	2020-03-31	ESSEX		25.0	0
CAMB-76C98	2020-03-30	2020-03-31	HERTFORDSHIRE		25.0	0
CAMB-71D4F	2020-03-30	2020-03-31	ESSEX		25.0	0
CAMB-769EC	2020-03-30	2020-03-31	ESSEX		24.0	0
CAMB-78E45	2020-04-02	2020-04-04	BEDFORDSHIRE	CAMS002621	25.0	2
CAMB-71D9A	2020-03-30	2020-03-31	SUFFOLK		27.0	0
CAMB-7A881	2020-04-02	2020-04-03	SUFFOLK		29.0	0
CAMB-72494	2020-03-23	2020-03-24	NOTTINGHAMSHIRE		24.0	0
CAMB-7240D	2020-03-24	2020-03-24	SUFFOLK		22.0	0
CAMB-76955	2020-03-30	2020-03-31	BUCKINGHAMSHIRE		25.0	0
CAMB-77FBC	2020-04-01	2020-04-02	GREATER_LONDON		25.0	0
CAMB-72A83	2020-03-23	2020-03-24	BEDFORDSHIRE		25.0	0
CAMB-775D8	2020-03-31	2020-04-01	BUCKINGHAMSHIRE		20.0	0
CAMB-78188	2020-04-01	2020-04-02	ESSEX	CAMS002186	21.0	2
CAMB-7A827	2020-04-02	2020-04-03	BUCKINGHAMSHIRE		19.0	0
CAMB-7A089	2020-04-02	2020-04-03	ESSEX		28.0	0
CAMB-778DF	2020-03-31	2020-04-01	ESSEX		28.0	0
CAMB-759FC	2020-03-29	2020-03-30	BEDFORDSHIRE		30.0	0
CAMB-775E7	None	2020-04-01	ESSEX		24.0	0
CAMB-75A44	2020-03-29	2020-03-30	LONDON		19.0	0
CAMB-721F7	2020-03-28	2020-03-29	LONDON		27.0	0
CAMB-77F61	2020-04-01	2020-04-02	GREATER_LONDON		23.0	0
CAMB-76041	2020-03-30	2020-03-31	ESSEX		27.0	0
CAMB-77417	2020-03-31	2020-04-01	BEDFORDSHIRE		28.0	0
CAMB-7954F	2020-04-03	2020-04-04	BUCKINGHAMSHIRE		19.0	0
CAMB-79758	2020-04-01	2020-04-02	ESSEX		21.0	0
CAMB-71B72	None	2020-04-01	CAMBRIDGESHIRE	CAMS001932	25.0	2
CAMB-763C0	2020-03-30	2020-03-30	ESSEX		21.0	0
CAMB-760F6	2020-03-30	2020-03-30	HERTFORDSHIRE	CAMS001653	24.0	2
CAMB-796E2	2020-04-03	2020-04-04	GREATER_LONDON		27.0	0
CAMB-759CF	2020-04-01	2020-04-01	BUCKINGHAMSHIRE		27.0	0
CAMB-79EAE	2020-04-01	2020-04-03	ESSEX		27.0	0
CAMB-780E5	None	None	None		None	0
CAMB-77B12	2020-03-31	2020-04-02	ESSEX		25.0	0
CAMB-77A51	2020-04-01	2020-04-02	GREATER_LONDON		22.0	0
CAMB-7630C	2020-03-29	2020-03-30	ESSEX		29.0	0
CAMB-71D30	2020-03-30	2020-03-31	ESSEX		24.0	0
CAMB-76384	2020-03-30	2020-03-30	ESSEX	CAMS001664	24.0	3
CAMB-71C8E	2020-03-30	2020-03-31	HERTFORDSHIRE		15.0	0
CAMB-78F24	2020-04-02	2020-04-04	BEDFORDSHIRE		25.0	0
CAMB-79B5C	2020-04-02	2020-04-03	GREATER_LONDON		28.0	0
CAMB-7667C	2020-03-29	2020-03-31	LONDON	CAMS001741	26.0	5
CAMB-78003	2020-04-01	2020-04-02	GREATER_LONDON		19.0	0
CAMB-76278	2020-03-29	2020-03-30	BEDFORDSHIRE		24.0	0
CAMB-7A70C	2020-04-02	2020-04-03	BUCKINGHAMSHIRE	CAMS002063	25.0	2
CAMB-79FE7	2020-04-01	2020-04-03	ESSEX	CAMS002414	26.0	2
CAMB-793AF	2020-04-02	2020-04-04	HERTFORDSHIRE		31.0	0
CAMB-77EEC	2020-04-02	2020-04-02	GREATER_LONDON		20.0	0
CAMB-7A8EB	2020-04-03	2020-04-03	BEDFORDSHIRE		31.0	0
CAMB-728A7	2020-03-22	2020-03-24	ESSEX		22.0	0
CAMB-75EDF	2020-03-29	2020-03-30	HERTFORDSHIRE		30.0	0
CAMB-79BF2	2020-04-01	2020-04-03	ESSEX		28.0	0
CAMB-76B22	2020-03-29	2020-03-30	SUFFOLK		17.0	0
CAMB-77B4F	2020-04-01	2020-04-02	HERTFORDSHIRE		28.0	0
CAMB-71F2B	2020-03-28	2020-03-29	ESSEX		28.0	0
CAMB-7A6A5	2020-04-02	2020-04-03	SUFFOLK	CAMS002325	27.0	2
CAMB-7286B	2020-03-23	2020-03-24	ESSEX		26.0	0
CAMB-776B7	2020-03-31	2020-04-01	ESSEX	CAMS001910	21.0	2
CAMB-7673D	2020-03-30	2020-03-31	HERTFORDSHIRE		25.0	0
CAMB-7A308	2020-04-02	2020-04-03	ESSEX		29.0	0
CAMB-76CC5	2020-03-29	2020-03-31	SUFFOLK		27.0	0
CAMB-7B5A7	2020-04-03	2020-04-04	SUFFOLK		22.0	0
CAMB-7620F	2020-03-30	2020-03-30	BEDFORDSHIRE		25.0	0
CAMB-725A0	2020-03-23	2020-03-24	NORFOLK		27.0	0
CAMB-72090	2020-03-28	2020-03-29	GREATER_LONDON		28.0	0
CAMB-78E36	2020-04-02	2020-04-04	BEDFORDSHIRE		27.0	0
CAMB-78C69	2020-04-02	2020-04-04	ESSEX		27.0	0
CAMB-77FDA	2020-04-01	2020-04-02	GREATER_LONDON		21.0	0
CAMB-795F4	None	2020-04-04	ESSEX		18.0	0
CAMB-79F32	2020-04-02	2020-04-03	HERTFORDSHIRE		22.0	0
CAMB-7814C	2020-04-01	2020-04-02	ESSEX		17.0	0
CAMB-75B23	2020-03-29	2020-03-30	BUCKINGHAMSHIRE		27.0	0
CAMB-79196	2020-04-03	2020-04-04	OTHER		16.0	0
CAMB-72AA1	2020-03-22	2020-03-24	BEDFORDSHIRE		28.0	0
CAMB-71ED3	2020-03-29	2020-03-29	ESSEX		19.0	0
CAMB-77392	2020-03-31	2020-04-01	GREATER_LONDON		27.0	0
CAMB-7A7B1	2020-04-03	2020-04-03	HERTFORDSHIRE		22.0	0
CAMB-792A2	2020-04-03	2020-04-04	ESSEX		29.0	0
CAMB-7774B	2020-03-31	2020-04-01	BEDFORDSHIRE		25.0	0
CAMB-7A13B	2020-04-02	2020-04-03	ESSEX		18.0	0
CAMB-790D5	2020-04-03	2020-04-04	SUFFOLK		16.0	0
CAMB-78012	2020-04-01	2020-04-02	GREATER_LONDON		26.0	0
CAMB-7B5D4	2020-04-04	2020-04-04	GREATER_LONDON		23.0	0
CAMB-768A3	2020-03-30	2020-03-31	ESSEX		23.0	0
CAMB-7A11D	2020-04-02	2020-04-03	ESSEX	CAMS002435	20.0	2
CAMB-7908A	2020-04-02	2020-04-04	OTHER		24.0	0
CAMB-76BC8	2020-03-29	2020-03-31	ESSEX		25.0	0
CAMB-7A0F2	2020-04-02	2020-04-03	ESSEX		23.0	0
CAMB-77F16	2020-04-01	2020-04-02	LONDON		21.0	0
CAMB-71F67	2020-03-28	2020-03-29	ESSEX		16.0	0
CAMB-790B7	2020-04-03	2020-04-04	ESSEX		28.0	0
CAMB-7A441	2020-04-02	2020-04-03	ESSEX		29.0	0
CAMB-7715C	2020-04-01	2020-04-02	ESSEX		29.0	0
CAMB-77C79	2020-04-01	2020-04-02	ESSEX	CAMS002162	25.0	2
CAMB-71E2E	2020-03-29	2020-03-30	CAMBRIDGESHIRE		30.0	0
CAMB-79C59	2020-04-02	2020-04-03	HERTFORDSHIRE		28.0	0
CAMB-768C1	2020-03-30	2020-03-31	LONDON	CAMS001486	15.0	2
CAMB-72546	2020-03-23	2020-03-24	CAMBRIDGESHIRE		24.0	0
CAMB-77ACA	2020-03-31	2020-04-02	BUCKINGHAMSHIRE		22.0	0
CAMB-79E26	2020-04-02	2020-04-03	ESSEX		23.0	0
CAMB-75CB7	2020-03-30	2020-03-30	CAMBRIDGESHIRE		22.0	0
CAMB-7809A	2020-03-31	2020-04-02	BEDFORDSHIRE		18.0	0
CAMB-76005	2020-03-28	2020-03-30	ESSEX		27.0	0
CAMB-76D68	2020-04-01	2020-04-02	GREATER_LONDON		27.0	0
CAMB-765CA	2020-03-29	2020-03-30	ESSEX	CAMS001666	15.0	2
CAMB-77E82	2020-04-01	2020-04-02	NORTHAMPTONSHIRE		21.0	0
CAMB-72607	2020-03-24	2020-03-24	CAMBRIDGESHIRE		27.0	0
CAMB-79D29	2020-04-02	2020-04-03	CAMBRIDGESHIRE		26.0	0
CAMB-75B32	2020-03-29	2020-03-30	HERTFORDSHIRE		16.0	0
CAMB-77927	2020-03-31	2020-04-01	BEDFORDSHIRE		20.0	0
CAMB-76D86	2020-03-31	2020-04-02	SUFFOLK	CAMS001867	24.0	4
CAMB-76CB6	2020-03-30	2020-03-31	HERTFORDSHIRE		21.0	0
CAMB-77444	2020-04-01	2020-04-01	HERTFORDSHIRE		28.0	0
CAMB-78D0C	2020-04-03	2020-04-04	HERTFORDSHIRE		30.0	0
CAMB-78BA8	2020-04-02	2020-04-04	LONDON		26.0	0
CAMB-7241C	2020-03-24	2020-03-24	SUFFOLK		21.0	0
CAMB-7A65A	2020-04-01	2020-04-03	BUCKINGHAMSHIRE		24.0	0
CAMB-775AB	2020-03-31	2020-04-01	ESSEX		31.0	0
CAMB-7614E	2020-03-30	2020-03-31	ESSEX		29.0	0
CAMB-71BDC	2020-03-30	2020-04-01	GREATER_LONDON		14.0	0
CAMB-79C0E	2020-04-02	2020-04-03	ESSEX		25.0	0
CAMB-72986	2020-03-23	2020-03-24	SUFFOLK		23.0	0
CAMB-77909	2020-03-31	2020-04-01	BEDFORDSHIRE		15.0	0
CAMB-76CD4	2020-03-30	2020-03-31	HERTFORDSHIRE	CAMS001762	25.0	3
CAMB-797FE	2020-04-01	2020-04-02	ESSEX		25.0	0
CAMB-7717A	2020-04-01	2020-04-02	ESSEX		14.0	0
CAMB-765E8	2020-03-30	2020-03-30	ESSEX		21.0	0
CAMB-75E1B	2020-03-28	2020-03-30	CAMBRIDGESHIRE		18.0	0
CAMB-78D39	2020-04-02	2020-04-04	OTHER		27.0	0
CAMB-72027	2020-03-28	2020-03-29	ESSEX		19.0	0
CAMB-7618A	2020-03-31	2020-03-31	HERTFORDSHIRE		25.0	0
CAMB-7A4AB	2020-04-02	2020-04-03	ESSEX		27.0	0
CAMB-78EAF	2020-04-02	2020-04-04	BEDFORDSHIRE		27.0	0
CAMB-779AF	2020-04-01	2020-04-02	NORFOLK		22.0	0
CAMB-75D2D	2020-03-29	2020-03-30	HERTFORDSHIRE		27.0	0
CAMB-76C3E	2020-03-29	2020-03-31	LONDON	CAMS001741	19.0	5
CAMB-75D69	2020-03-29	2020-03-30	HERTFORDSHIRE		21.0	0
CAMB-7957C	2020-04-03	2020-04-04	HERTFORDSHIRE		22.0	0
CAMB-759ED	2020-03-31	2020-04-01	BUCKINGHAMSHIRE	CAMS002063	20.0	2
CAMB-71CE8	2020-03-30	2020-03-31	BUCKINGHAMSHIRE		27.0	0
CAMB-77778	2020-03-30	2020-03-31	BEDFORDSHIRE		25.0	0
CAMB-72124	2020-03-28	2020-03-29	GREATER_LONDON		29.0	0
CAMB-77B8B	2020-04-01	2020-04-02	GREATER_LONDON		21.0	0
CAMB-764FA	2020-03-29	2020-03-30	GREATER_LONDON		23.0	0
CAMB-7716B	2020-04-01	2020-04-02	ESSEX		18.0	0
CAMB-77DB2	2020-04-01	2020-04-02	SUFFOLK		21.0	0
CAMB-720AF	2020-03-28	2020-03-29	GREATER_LONDON		20.0	0
CAMB-77101	2020-04-01	2020-04-02			30.0	0
CAMB-77541	2020-04-01	2020-04-01	ESSEX		14.0	0
CAMB-76779	2020-03-30	2020-03-31	HERTFORDSHIRE		26.0	0
CAMB-75E66	2020-03-28	2020-03-30			22.0	0
CAMB-7A292	2020-04-01	2020-04-03	HERTFORDSHIRE		17.0	0
CAMB-76B13	2020-03-30	2020-03-31	ESSEX		30.0	0
CAMB-7904E	2020-04-03	2020-04-04	HERTFORDSHIRE		23.0	0
CAMB-79451	2020-04-03	2020-04-04	BEDFORDSHIRE		24.0	0
CAMB-7A1E0	2020-04-02	2020-04-03	CAMBRIDGESHIRE		27.0	0
CAMB-77AD9	2020-04-01	2020-04-02	HERTFORDSHIRE		29.0	0
CAMB-79DFC	2020-04-02	2020-04-03	HERTFORDSHIRE		27.0	0
CAMB-77981	2020-03-31	2020-04-01	BUCKINGHAMSHIRE	CAMS002268	31.0	1
CAMB-72B17	2020-03-22	2020-03-24	BEDFORDSHIRE		26.0	0
CAMB-79275	2020-04-02	2020-04-04	BUCKINGHAMSHIRE		28.0	0
CAMB-79336	2020-04-03	2020-04-04	BEDFORDSHIRE		27.0	0
CAMB-76CF2	2020-03-30	2020-03-31	BEDFORDSHIRE		31.0	0
CAMB-79FC9	2020-04-02	2020-04-03	LONDON		30.0	0
CAMB-759B0	2020-03-31	2020-04-01	LONDON		22.0	0
CAMB-77CD3	2020-04-01	2020-04-02	ESSEX		29.0	0
CAMB-7A195	2020-04-02	2020-04-03	ESSEX		26.0	0
CAMB-71C51	2020-03-31	2020-04-01	SUFFOLK		30.0	0
CAMB-78C5A	2020-04-03	2020-04-04	HERTFORDSHIRE		25.0	0
CAMB-77189	None	2020-04-02	GREATER_LONDON		22.0	0
CAMB-7668B	2020-03-30	2020-03-31	LONDON	CAMS001741	None	5
CAMB-77B9A	2020-04-03	2020-04-04	CAMBRIDGESHIRE		29.0	0
CAMB-76849	2020-03-30	2020-03-31	LONDON		27.0	0
CAMB-776E4	2020-03-31	2020-04-01	BEDFORDSHIRE		23.0	0
CAMB-763EE	2020-03-30	2020-03-30	ESSEX		25.0	0
CAMB-75983	2020-03-31	2020-04-01	ESSEX		22.0	0
CAMB-79B7A	2020-04-02	2020-04-03	GREATER_LONDON		29.0	0
CAMB-78DA2	2020-04-03	2020-04-04	BEDFORDSHIRE		30.0	0
CAMB-76551	2020-03-29	2020-03-30	ESSEX		22.0	0
CAMB-77F52	2020-04-01	2020-04-02	BEDFORDSHIRE	CAMS000499	21.0	1
CAMB-79794	2020-04-01	2020-04-02	HERTFORDSHIRE		24.0	0
CAMB-793DC	2020-04-03	2020-04-04	ESSEX		17.0	0
CAMB-7811F	2020-04-01	2020-04-02	GREATER_LONDON		21.0	0
CAMB-77AF7	2020-04-01	2020-04-02	HERTFORDSHIRE		26.0	0
CAMB-7A678	2020-04-01	2020-04-03	HERTFORDSHIRE		23.0	0
CAMB-7A56C	2020-04-02	2020-04-03	ESSEX		25.0	0
CAMB-792C0	2020-04-03	2020-04-04	ESSEX		23.0	0
CAMB-76B31	2020-03-31	2020-03-31	HERTFORDSHIRE		18.0	0
CAMB-7730B	2020-03-30	2020-04-01	ESSEX		25.0	0
CAMB-7763F	2020-03-31	2020-04-01	HERTFORDSHIRE		29.0	0
CAMB-71C9D	2020-03-31	2020-03-31	BUCKINGHAMSHIRE		20.0	0
CAMB-71F0D	2020-03-29	2020-03-29	ESSEX		23.0	0
CAMB-765AC	2020-03-30	2020-03-30	ESSEX		21.0	0
CAMB-76612	2020-03-29	2020-03-30	HERTFORDSHIRE		31.0	0
CAMB-79CB3	2020-04-02	2020-04-03	ESSEX		21.0	0
CAMB-71EF1	2020-03-29	2020-03-29	ESSEX		13.0	0
CAMB-7A3BD	2020-04-01	2020-04-03	LONDON		27.0	0
CAMB-7250A	2020-03-22	2020-03-24	CAMBRIDGESHIRE		20.0	0
CAMB-7275F	2020-03-23	2020-03-24	HERTFORDSHIRE		29.0	0
CAMB-77E19	2020-04-04	2020-04-04	CAMBRIDGESHIRE		29.0	0
CAMB-7A72A	2020-04-02	2020-04-03	BUCKINGHAMSHIRE		23.0	0
CAMB-79F23	2020-04-02	2020-04-03	ESSEX	CAMS002414	25.0	2
CAMB-75D4B	2020-03-29	2020-03-30	HERTFORDSHIRE		26.0	0
CAMB-79406	2020-04-03	2020-04-04	ESSEX		21.0	0
CAMB-7B6A4	2020-04-03	2020-04-04	SUFFOLK	CAMS001867	22.0	4
CAMB-75E57	2020-03-28	2020-03-30	ESSEX		27.0	0
CAMB-71C15	2020-03-31	2020-04-01	HERTFORDSHIRE		23.0	0
CAMB-761D5	2020-03-30	2020-03-30	CAMBRIDGESHIRE		14.0	0
CAMB-71C06	2020-03-31	2020-04-01	GREATER_LONDON		25.0	0
CAMB-76120	2020-03-30	2020-03-31	ESSEX	CAMS001633	25.0	1
CAMB-72458	2020-03-24	2020-03-24	ESSEX		28.0	0
CAMB-796F1	2020-04-04	2020-04-04	HERTFORDSHIRE		18.0	0
CAMB-797C1	2020-04-02	2020-04-02	CAMBRIDGESHIRE		25.0	0
CAMB-7242B	2020-03-24	2020-03-24	CAMBRIDGESHIRE	CAMS000741	20.0	2
CAMB-75A9F	2020-03-28	2020-03-30	BEDFORDSHIRE	CAMS001234	27.0	1
CAMB-797D0	2020-04-01	2020-04-02	ESSEX		21.0	0
CAMB-7949D	2020-04-03	2020-04-04	BUCKINGHAMSHIRE		26.0	0
CAMB-773ED	2020-03-31	2020-04-01	HERTFORDSHIRE		21.0	0
CAMB-76ECF	2020-03-31	2020-04-02	SUFFOLK	CAMS002088	20.0	1
CAMB-793FA	2020-04-03	2020-04-04	BUCKINGHAMSHIRE		19.0	0
CAMB-77EA0	2020-04-01	2020-04-02	GREATER_LONDON		28.0	0
CAMB-79178	2020-04-03	2020-04-04	ESSEX		28.0	0
CAMB-7766C	2020-03-31	2020-04-01	ESSEX		25.0	0
CAMB-761C6	2020-03-29	2020-03-30	BEDFORDSHIRE		29.0	0
CAMB-75DD2	2020-03-29	2020-03-30	HERTFORDSHIRE		27.0	0
CAMB-79433	2020-04-03	2020-04-04	BUCKINGHAMSHIRE		20.0	0
CAMB-7A4F6	2020-04-01	2020-04-03	ESSEX		29.0	0
CAMB-77C00	2020-04-01	2020-04-02	HERTFORDSHIRE		31.0	0
CAMB-7675B	2020-03-31	2020-03-31	GREATER_LONDON		29.0	0
CAMB-7961F	2020-04-03	2020-04-04	ESSEX		24.0	0
CAMB-7A520	2020-04-02	2020-04-03	ESSEX	CAMS002516	26.0	1
CAMB-75E93	2020-03-29	2020-03-30	CAMBRIDGESHIRE		24.0	0
CAMB-75C4E	2020-03-28	2020-03-30	BUCKINGHAMSHIRE		17.0	0
CAMB-7228B	2020-03-28	2020-03-29	ESSEX		29.0	0
CAMB-773A1	2020-03-31	2020-04-01	GREATER_LONDON		24.0	0
CAMB-75BC9	2020-03-29	2020-03-30	HERTFORDSHIRE		21.0	0
CAMB-778EE	2020-03-31	2020-04-01	BEDFORDSHIRE		24.0	0
CAMB-79512	2020-04-03	2020-04-04	ESSEX		22.0	0
CAMB-728E3	2020-03-23	2020-03-24	ESSEX		24.0	0
CAMB-77E73	2020-04-03	2020-04-03	HERTFORDSHIRE	CAMS002560	29.0	1
CAMB-724C1	2020-03-24	2020-03-25	ESSEX		23.0	0
CAMB-769CE	2020-03-30	2020-03-31	GREATER_LONDON	CAMS001662	21.0	2
CAMB-72670	2020-03-24	2020-03-24	LONDON	CAMS000672	21.0	2
CAMB-7A5F3	2020-04-02	2020-04-03	SUFFOLK		22.0	0
CAMB-76ACB	2020-03-30	2020-03-31	CAMBRIDGESHIRE		27.0	0
CAMB-7682B	2020-03-30	2020-03-31	CAMBRIDGESHIRE	CAMS001715	26.0	4
CAMB-7690A	2020-03-30	2020-03-31	SUFFOLK		22.0	0
CAMB-771C5	2020-04-01	2020-04-02	HERTFORDSHIRE		26.0	0
CAMB-77E64	2020-04-01	2020-04-02	ESSEX		21.0	0
CAMB-78D1B	2020-04-02	2020-04-04	ESSEX		22.0	0
CAMB-76463	2020-03-30	2020-03-30	HERTFORDSHIRE	CAMS001653	20.0	2
CAMB-72054	2020-03-29	2020-03-29	HERTFORDSHIRE	CAMS001467	27.0	2
CAMB-72063	2020-03-28	2020-03-29	SUFFOLK	CAMS001465	25.0	2
CAMB-79EDB	2020-04-01	2020-04-03	BEDFORDSHIRE	CAMS000791	20.0	1
CAMB-77BB8	None	None	None		None	0
CAMB-71BBE	2020-03-31	2020-04-01	ESSEX		29.0	0
CAMB-7A5C6	2020-04-02	2020-04-03	HERTFORDSHIRE		17.0	0
CAMB-77ABB	2020-04-01	2020-04-02	GREATER_LONDON	CAMS002279	29.0	2
CAMB-7A4BA	2020-04-02	2020-04-03	HERTFORDSHIRE		24.0	0
CAMB-76EA1	2020-03-31	2020-04-02	SUFFOLK		14.0	0
CAMB-7A890	2020-04-02	2020-04-03	HERTFORDSHIRE		21.0	0
CAMB-75E48	2020-03-29	2020-03-30	GREATER_LONDON		28.0	0
CAMB-726CB	2020-03-24	2020-03-24	CAMBRIDGESHIRE		16.0	0
CAMB-71FEF	2020-03-28	2020-03-29	ESSEX		27.0	0
CAMB-7218E	2020-03-29	2020-03-29	GREATER_LONDON		17.0	0
CAMB-79239	2020-04-03	2020-04-04	ESSEX		20.0	0
CAMB-79460	2020-04-03	2020-04-04	ESSEX		25.0	0
CAMB-7631B	2020-03-30	2020-03-30	ESSEX		20.0	0
CAMB-764EB	2020-03-30	2020-03-30	LONDON		27.0	0
CAMB-79C2C	2020-04-02	2020-04-03	HERTFORDSHIRE		29.0	0
CAMB-71FB2	2020-03-28	2020-03-29	ESSEX		27.0	0
CAMB-77DC1	2020-04-01	2020-04-02	ESSEX		29.0	0
CAMB-78B02	2020-04-03	2020-04-04	ESSEX		13.0	0
CAMB-79D83	2020-04-01	2020-04-03	SUFFOLK		26.0	0
CAMB-71AFD	2020-03-31	2020-04-01	BEDFORDSHIRE		28.0	0
CAMB-7A863	2020-04-02	2020-04-03	BUCKINGHAMSHIRE		25.0	0
CAMB-72661	2020-03-24	2020-03-24	HERTFORDSHIRE		31.0	0
CAMB-7A405	2020-04-02	2020-04-03	ESSEX		16.0	0
CAMB-77D58	2020-04-01	2020-04-02	ESSEX		24.0	0
CAMB-7294A	2020-03-22	2020-03-24			23.0	0
CAMB-71F58	2020-03-28	2020-03-29	LONDON	CAMS001486	31.0	2
CAMB-7A696	2020-04-03	2020-04-03	HERTFORDSHIRE		24.0	0
CAMB-763FD	2020-03-29	2020-03-30	ESSEX		27.0	0
CAMB-7758D	2020-03-31	2020-04-01	ESSEX	CAMS001295	18.0	1
CAMB-7A7C0	2020-04-02	2020-04-03	GREATER_LONDON		17.0	0
CAMB-79D65	2020-04-01	2020-04-03	ESSEX		26.0	0
CAMB-77DEF	2020-04-01	2020-04-02	ESSEX		16.0	0
CAMB-7A64B	2020-04-02	2020-04-03	BUCKINGHAMSHIRE		21.0	0
CAMB-7B589	2020-04-03	2020-04-04	ESSEX	CAMS002832	16.0	2
CAMB-79CE0	2020-04-02	2020-04-03	SUFFOLK	CAMS002291	24.0	2
CAMB-7780C	2020-03-31	2020-04-01	BEDFORDSHIRE		22.0	0
CAMB-7A1C2	2020-04-02	2020-04-03	ESSEX		29.0	0
CAMB-762C3	2020-03-30	2020-03-30	ESSEX		26.0	0
CAMB-77875	2020-03-31	2020-04-01	ESSEX		25.0	0
CAMB-78B3F	2020-04-03	2020-04-04	ESSEX	CAMS002186	26.0	2
CAMB-77990	2020-03-31	2020-04-01	ESSEX	CAMS002015	24.0	2
CAMB-77CB5	2020-04-01	2020-04-02	ESSEX		17.0	0
CAMB-728C5	2020-03-23	2020-03-24	ESSEX		27.0	0
CAMB-7B62C	2020-04-03	2020-04-04	OTHER		25.0	0
CAMB-722F4	2020-03-28	2020-03-29	ESSEX		22.0	0
CAMB-77F70	2020-03-31	2020-04-02	HERTFORDSHIRE		21.0	0
CAMB-7A809	2020-04-02	2020-04-03	SUFFOLK		24.0	0
CAMB-724A3	2020-03-23	2020-03-24	CAMBRIDGESHIRE		26.0	0
CAMB-7956D	2020-04-03	2020-04-04	ESSEX		28.0	0
CAMB-7756F	2020-03-31	2020-04-01	LONDON	CAMS002054	28.0	2
CAMB-7A2A1	None	2020-04-03	CAMBRIDGESHIRE		25.0	0
CAMB-7A7A2	2020-04-03	2020-04-03	SUFFOLK		None	0
CAMB-768B2	2020-03-29	2020-03-31	SUFFOLK		18.0	0
CAMB-77E46	2020-04-01	2020-04-02	OTHER		13.0	0
CAMB-72A29	2020-03-24	2020-03-24	HERTFORDSHIRE		26.0	0
CAMB-77C6A	2020-04-01	2020-04-02	OTHER		26.0	0
CAMB-728B6	2020-03-22	2020-03-24	ESSEX		18.0	0
CAMB-71DF4	2020-03-30	2020-03-31	ESSEX		29.0	0
CAMB-76630	2020-03-29	2020-03-30	HERTFORDSHIRE		24.0	0
CAMB-79688	2020-04-03	2020-04-04	GREATER_LONDON		29.0	0
CAMB-7A098	2020-04-02	2020-04-03	ESSEX		18.0	0
CAMB-78DC0	2020-04-02	2020-04-04	BEDFORDSHIRE	CAMS002625	30.0	1
CAMB-79C3B	2020-04-01	2020-04-03	BEDFORDSHIRE		23.0	0
CAMB-76991	2020-03-30	2020-03-31	CAMBRIDGESHIRE	CAMS001715	21.0	4
CAMB-761A8	2020-03-30	2020-03-31	ESSEX		20.0	0
CAMB-75B50	2020-03-28	2020-03-30	BUCKINGHAMSHIRE	CAMS001503	20.0	2
CAMB-7767B	2020-03-31	2020-04-01	CAMBRIDGESHIRE		16.0	0
CAMB-75B6F	2020-03-29	2020-03-30	BUCKINGHAMSHIRE		15.0	0
CAMB-75BF6	2020-03-29	2020-03-30	ESSEX		20.0	0
CAMB-7815B	2020-03-31	2020-04-02	CAMBRIDGESHIRE		17.0	0
CAMB-76982	2020-03-30	2020-03-31	ESSEX		18.0	0
CAMB-77EFB	2020-03-31	2020-04-02	CAMBRIDGESHIRE		24.0	0
CAMB-75B41	2020-03-29	2020-03-30	BUCKINGHAMSHIRE		26.0	0
CAMB-72889	2020-03-23	2020-03-24	ESSEX		16.0	0
CAMB-7764E	2020-03-31	2020-04-01	GREATER_LONDON		16.0	0
CAMB-729E0	2020-03-22	2020-03-24	ESSEX		27.0	0
CAMB-7A3CC	2020-04-02	2020-04-03	ESSEX		24.0	0
CAMB-78AD8	2020-04-02	2020-04-04	ESSEX		25.0	0
CAMB-7A9E8	2020-04-02	2020-04-03	OTHER		23.0	0
CAMB-71BEB	2020-03-30	2020-04-01	GREATER_LONDON		27.0	0
CAMB-76D4A	2020-04-02	2020-04-02	LONDON		19.0	0
CAMB-75974	2020-03-31	2020-04-01	SUFFOLK		20.0	0
CAMB-75956	2020-03-31	2020-04-01	ESSEX		25.0	0
CAMB-79CC2	2020-04-02	2020-04-03	HERTFORDSHIRE		27.0	0
CAMB-769FB	2020-03-30	2020-03-31	ESSEX		20.0	0
CAMB-776F3	2020-03-30	2020-03-31	GREATER_LONDON		17.0	0
CAMB-7A1B3	2020-04-02	2020-04-03	OTHER		20.0	0
CAMB-7816A	2020-04-01	2020-04-02	ESSEX		18.0	0
CAMB-72968	2020-03-23	2020-03-24	ESSEX		31.0	0
CAMB-71AA2	2020-03-31	2020-04-01	BEDFORDSHIRE		26.0	0
CAMB-71C24	2020-03-31	2020-04-01	SUFFOLK		25.0	0
CAMB-77480	2020-03-31	2020-04-01	HERTFORDSHIRE		24.0	0
CAMB-773B0	2020-03-31	2020-04-01	ESSEX		24.0	0
CAMB-762E1	2020-03-30	2020-03-30	ESSEX		22.0	0
CAMB-797B2	2020-04-01	2020-04-02	ESSEX		22.0	0
CAMB-76CE3	None	2020-03-31	SUFFOLK		28.0	0
CAMB-79DA1	2020-04-02	2020-04-03	OTHER		25.0	0
CAMB-79DED	2020-04-02	2020-04-03	SUFFOLK		25.0	0
CAMB-77286	2020-03-30	2020-04-01	ESSEX		20.0	0
CAMB-7A924	2020-04-03	2020-04-03	HERTFORDSHIRE		27.0	0
CAMB-7234C	2020-03-29	2020-03-30	ESSEX		18.0	0
CAMB-77620	None	2020-04-01	HERTFORDSHIRE		25.0	0
CAMB-71DE5	2020-03-30	2020-03-31	ESSEX		15.0	0
CAMB-7772D	2020-03-31	2020-04-01	ESSEX		26.0	0
CAMB-71B09	2020-03-31	2020-04-01	CAMBRIDGESHIRE	CAMS001793	31.0	1
CAMB-76393	2020-03-30	2020-03-30	HERTFORDSHIRE		18.0	0
CAMB-71AC0	2020-03-31	2020-04-01	CAMBRIDGESHIRE		21.0	0
CAMB-77796	2020-03-30	2020-03-31	SUFFOLK		24.0	0
CAMB-77972	2020-03-31	2020-04-01	ESSEX		16.0	0
CAMB-79882	2020-04-01	2020-04-02	OTHER		16.0	0
CAMB-75C7B	2020-03-30	2020-03-30	CAMBRIDGESHIRE		26.0	0
CAMB-76CA7	2020-03-28	2020-03-31	ESSEX		29.0	0
CAMB-77D0D	2020-04-01	2020-04-02	HERTFORDSHIRE		18.0	0
CAMB-7A775	2020-04-03	2020-04-03	NOTTINGHAMSHIRE		30.0	0
CAMB-7A2CF	2020-04-02	2020-04-03	ESSEX		22.0	0
CAMB-75F81	2020-03-29	2020-03-30	GREATER_LONDON		28.0	0
CAMB-78BB7	2020-04-03	2020-04-04	ESSEX		30.0	0
CAMB-71F1C	2020-03-29	2020-03-29	HERTFORDSHIRE		19.0	0
CAMB-78F33	2020-04-02	2020-04-04	BUCKINGHAMSHIRE		28.0	0
CAMB-75A71	2020-03-28	2020-03-30	BEDFORDSHIRE		22.0	0
CAMB-7621E	2020-03-30	2020-03-30	BEDFORDSHIRE		30.0	0
CAMB-72036	2020-03-28	2020-03-29	ESSEX		24.0	0
CAMB-75BD8	2020-03-29	2020-03-30		CAMS001518	25.0	1
CAMB-73CC8	2020-04-01	2020-04-02	CAMBRIDGESHIRE		16.0	0
